# Supplementary material for: Cross-tissue immune profiling of APOE ε4 reveals early dysregulation in Alzheimer’s disease
Source: Research Square preprint supplement (doi:10.21203/rs.3.rs-7089423/v1), 2025-07-15
Supplement: Supplementary file 1 [file 3fef80f260f46fe4bb1bb782.xlsx]

## Sheet: Table of Contents
Cross-tissue immune profiling of APOE ε4 reveals early dysregulation in Alzheimer’s disease
Table of Contents
Supplementary Table 1	Demographic and clinicial characteristics of the GNPC cohort (n=10,127)
Supplementary Table 2	Identified APOE ε4 proteins from the plasma of GNPC cohort (n=9 proteins)
Supplementary Table 3	Identified APOE ε4 proteins from the cerebrospinal fluid of GNPC cohort (n=51 proteins)
Supplementary Table 4	Functional enrichment analyses for APOE ε4 proteins from the plasma and cerebrospinal fluid from GNPC cohort
Supplementary Table 5	Demographic characteristics of the AMP-AD Diverse Cohorts donors
Supplementary Table 6	Identified APOE ε4 proteins from the dorsolateral prefrontal cortex and superior temporal gyrus of AMP-AD Diverse Cohorts study
Supplementary Table 7	Functional enrichment analyses for APOE ε4 proteins from the dorsolateral prefrontal cortex and superior temporal gyrus of AMP-AD Diverse Cohorts study
Supplementary Table 8	Identified APOE ε4 proteins from cortical organoids at four weeks and eight weeks
Supplementary Table 9	Functional enrichment analyses for differentially expressed proteins from APOE ε4 cortical organoids relative to non-carrier cortical organoids
Supplementary Table 10	Demographic and clinicial characteristics of the Therapeutic Diets in AD pilot clinical trial
Supplementary Table 11	Identified APOE ε4 proteins that changed over time from the Therapeutic Diets in AD clinical trial (n=264 proteins)
Supplementary Table 12	Functional enrichment analyses for differentially expressed plasma proteins in APOE ε4 from Therapeutic Diets in AD pilot clinical trial

## Sheet: Supplementary Table 1
Supplementary Table 1. Demographic and clinicial characteristics of the GNPC cohort (n=10,127)
		Cerebrospinal fluid (n=1,099)			Plasma (n=9,028)
		Non-impaired control	Alzheimer's disease		Non-impaired control	Alzheimer's disease
Total N		573	526		6099	2929
Age (Mean (IQR))		71 (12)	76 (9)		71 (15)	77(11)
Sex	Male (%)	252 (44%)	201 (38%)		2580 (42%)	1283 (44%)
	Female (%)	321 (56%)	325 (62%)		3519 (58%)	1646 (56%)
APOE genotype	22	2	1		26	9
	23	51	24		662	180
	33	364	263		3284	1241
	24	10	10		144	78
	34	129	189		1735	1151
	44	17	39		248	270
Race	American Indian or Alaskan Native	0	0		600	147
	Black or African American	0	0		268	53
	Native Hawaiian or Other Pacific Islander	0	0		4	1
	Asian	0	0		8	3
	White	573	526		1358	501
	Other	0	0		46	4
	Unknown	0	0		3815	2220
Years of education (Mean (IQR))		8 (6)	6 (5)		14 (6)	12 (9)
CDR	3	0	0		1	58
	2	0	41		0	259
	1	0	272		1	1589
	0	561	211		3629	277
	Not specified	12	2		2468	746
MMSE (Mean (IQR))		28 (3)	22 (6)		29 (2)	23 (8)
MOCA (Mean (IQR))		N/A	N/A		27 (4)	18 (12)

## Sheet: Supplementary Table 2
Supplementary Table 2. Identified APOE ε4 proteins from the plasma of GNPC cohort (n=9 proteins)
Uniprot ID	Protein abbreviation	Protein Name	Mutual information value	Direction of Change
Q9HBM1	SPC25	SPC25 component of NDC80 kinetochore complex	0.490308	Increased
O75347	TBCA	tubulin folding cofactor A	0.271801	Decreased
Q6UXK5	LRRN1	leucine rich repeat neuronal 1	0.259796	Increased
P07196	NEFL	neurofilament light chain	0.244487	Decreased
Q99584	S100A13	S100 calcium binding protein A13	0.22929	Decreased
O43175	PHGDH	phosphoglycerate dehydrogenase	0.157446	Decreased
Q12778	FOXO1	forkhead box O1	0.140873	Decreased
Q7Z5W3	BCDIN3D	BCDIN3 domain containing RNA methyltransferase	0.140463	Decreased
Q92185	ST8SIA1	ST8 alpha-N-acetyl-neuraminide alpha-2,8-sialyltransferase 1	0.136059	Decreased

## Sheet: Supplementary Table 3
Supplementary Table 3. Identified APOE ε4 proteins from the cerebrospinal fluid of GNPC cohort (n=51 proteins)
Uniprot ID	Protein abbreviation	Protein Name	Mutual information value	Direction of Change
Q9HBM1	SPC25	SPC25 component of NDC80 kinetochore complex	0.634245	Increased
Q6UXK5	LRRN1	leucine rich repeat neuronal 1	0.609774	Increased
Q96BN8	OTULIN	OTU deubiquitinase with linear linkage specificity	0.5512	Increased
Q99584	S100A13	S100 calcium binding protein A13	0.52829	Decreased
O15444	CCL25	C-C motif chemokine ligand 25	0.50048	Increased
O75347	TBCA	tubulin folding cofactor A	0.494603	Decreased
Q9BUK0	CHCHD7	coiled-coil-helix-coiled-coil-helix domain containing 7	0.453087	Increased
O75452	RDH16	retinol dehydrogenase 16	0.403098	Decreased
O00165	HAX1	HCLS1 associated protein X-1	0.375441	Increased
A2RU49	HYKK	hydroxylysine kinase	0.373978	Decreased
P62306	SNRPF	small nuclear ribonucleoprotein polypeptide F	0.360849	Decreased
Q92730	RND1	Rho family GTPase 1	0.352105	Increased
Q9Y216	MTMR7	myotubularin related protein 7	0.349272	Decreased
P61968	LMO4	LIM domain only 4	0.335031	Decreased
Q16619	CTF1	cardiotrophin 1	0.329448	Increased
Q9Y6U7	RNF215	ring finger protein 215	0.326837	Increased
O95260	ATE1	arginyltransferase 1	0.309083	Decreased
Q12778	FOXO1	forkhead box O1	0.292693	Decreased
O14896	IRF6	interferon regulatory factor 6	0.236629	Decreased
O14683	TP53I11	tumor protein p53 inducible protein 11	0.234481	Decreased
P36404	ARL2	ADP ribosylation factor like GTPase 2	0.231612	Decreased
O95994	AGR2	anterior gradient 2, protein disulphide isomerase family member	0.215911	Increased
Q9Y3A3	MOB4	MOB family member 4, phocein	0.201234	Decreased
O43175	PHGDH	phosphoglycerate dehydrogenase	0.199947	Decreased
Q8TF39	ZNF483	zinc finger protein 483	0.197466	Decreased
Q96EP1	CHFR	checkpoint with forkhead and ring finger domains	0.19696	Increased
O95352	ATG7	autophagy related 7	0.194312	Decreased
Q8WUK0	PTPMT1	protein tyrosine phosphatase mitochondrial 1	0.194211	Decreased
Q13825	AUH	AU RNA binding methylglutaconyl-CoA hydratase	0.193404	Decreased
P62324	BTG1	BTG anti-proliferation factor 1	0.19189	Increased
Q9UBQ0	VPS29	VPS29 retromer complex component	0.189079	Decreased
Q14681	KCTD2	potassium channel tetramerization domain containing 2	0.180645	Decreased
Q03426	MVK	mevalonate kinase	0.170071	Decreased
Q8N8Q1	CYB561D1	cytochrome b561 family member D1	0.167181	Decreased
Q86SI9	IRX2-DT	uncharacterized	0.166002	Increased
P45983	MAPK8	mitogen-activated protein kinase 8	0.163445	Increased
P0C024	NUDT7	nudix hydrolase 7	0.159106	Decreased
P08727	KRT19	keratin 19	0.156057	Decreased
Q9BQE4	SELENOS	selenoprotein S	0.153576	Decreased
P14649	MYL6B	myosin light chain 6B	0.140571	Decreased
O00744	WNT10B	Wnt family member 10B	0.138041	Decreased
Q8N4L8	CCDC24	coiled-coil domain containing 24	0.135948	Decreased
P49675	STAR	steroidogenic acute regulatory protein	0.133219	Increased
O43281	EFS	embryonal Fyn-associated substrate	0.131422	Decreased
Q9H9V4	RNF122	ring finger protein 122	0.128459	Increased
Q9BXA7	TSSK1B	testis specific serine kinase 1B	0.127777	Increased
Q0P6D2	DIPK1C	divergent protein kinase domain 1C	0.12376	Decreased
Q9UGI0	ZRANB1	zinc finger RANBP2-type containing 1	0.123721	Decreased
O95825	CRYZL1	crystallin zeta like 1	0.123097	Decreased
Q86V35	CABP7	calcium binding protein 7	0.119793	Decreased
Q9Y5K5	UCHL5	ubiquitin C-terminal hydrolase L5	0.117296	Decreased

## Sheet: Supplementary Table 4
Supplementary Table 4. Functional enrichment analyses for APOE ε4 proteins from the plasma and CSF of GNPC cohort
PANTHER Biological Processes				KEGG Immune-Related Pathways				Reactome Immune-Related Pathways
Pathway	FDR (Plasma)	FDR (CSF)		Pathway	FDR (Plasma)	FDR (CSF)		Pathway	FDR (Plasma)	FDR (CSF)
Negative regulation of apoptotic process	2.35e-05	2.6e-14		Epstein-Barr virus infection	1.18e-05	4.11e-21		Immune System	0.000875	7.94e-33
Viral process	2.48e-05	1.53e-22		Hepatitis B	3.65e-05	4.3e-22		Cytokine Signaling in Immune system	0.00179	7.71e-12
RNA splicing	4.45e-05	2.3e-09		Viral carcinogenesis	0.000199	1.17e-13		Interferon gamma signaling	0.00586
MRNA 3'_end processing	5.5e-05	0.00315		Hepatitis C	0.00058	6.62e-13		Interferon Signaling	0.011
MRNA processing	8.88e-05	5e-07		Kaposi's sarcoma-associated herpesvirus infection	0.00233	1.21e-15		Innate Immune System	0.0177	2.71e-13
MRNA splicing, via spliceosome	8.88e-05	4.56e-08		IL-17 signaling pathway	0.00328	3.31e-06		RIG-I/MDA5 mediated induction of IFN-alpha/beta pathways	0.0188	1.26e-07
Protein phosphorylation	0.000217	6.67e-07		Measles	0.0052	1.87e-09		Interferon alpha/beta signaling	0.0196
Cell cycle	0.000297	3.2e-07		Influenza A	0.0134	0.0001		TRAF6 mediated IRF7 activation	0.0256
Cell proliferation	0.000424	3.56e-06		HTLV-I infection	0.0172	3.7e-11		Adaptive Immune System	0.0259	5.03e-24
Chromosome segregation	0.0028	0.00652		Tuberculosis	0.0174	1.3e-07		TGF-beta receptor signaling activates SMADs	0.0289
Cellular process	0.00516	0.000788		RIG-I-like receptor signaling pathway	0.0174	8.62e-06		TRAF3-dependent IRF activation pathway	0.0307
Regulation of binding	0.00833	0.00601		Toll-like receptor signaling pathway	0.0177	1.8e-06		Negative regulators of RIG-I/MDA5 signaling	0.0325
Regulation of cell cycle	0.00833	3.56e-06		Th17 cell differentiation	0.0198	2.96e-05		Signaling by Interleukins	0.0325	3.82e-09
Transcription, DNA_templated	0.0162	3.43e-06		TNF signaling pathway	0	6.62e-11		Class I MHC mediated antigen processing & presentation	0.0329	1.52e-25
MRNA polyadenylation	0.0329	0.000169		T cell receptor signaling pathway	0	1.13e-06		Activation of IRF3/IRF7 mediated by TBK1/IKK epsilon	0.0341
Transcription by RNA polymerase II	0.0329	0		Chagas disease (American trypanosomiasis)	0	1.57e-06		DAP12 signaling	0.0462
DNA repair	0	2.69e-10		Shigellosis	0	3.05e-06		Activation of NF-kappaB in B Cells		9.01e-27
Apoptotic process	0	1.89e-09		NOD-like receptor signaling pathway	0	7.64e-06		Vpu mediated degradation of CD4		1.41e-26
Chromatin remodeling	3.08e-08	0		TGF-beta signaling pathway	0	9.62e-06		Antigen processing: Ubiquitination & Proteasome degradation		3.15e-26
DNA recombination	3.3e-07	0		Fc epsilon RI signaling pathway	0	2.19e-05		Signaling by the B Cell Receptor (BCR)		1.01e-25
Rhythmic process	5e-07	0		Toxoplasmosis	0	2.25e-05		Downstream Signaling Events Of B Cell Receptor (BCR)		1.87e-25
Protein folding	0.000907	0		Pathogenic Escherichia coli infection	0	2.42e-05		Vif-mediated degradation of APOBEC3G		1.14e-24
Cellular protein modification process	0.00163	0		Adipocytokine signaling pathway	0	0.000381		Cross-presentation of soluble exogenous antigens (endosomes)		1.56e-23
Circadian rhythm	0.00496	0		B cell receptor signaling pathway	0	0.000525		Antigen processing-Cross presentation		3.97e-19
Regulation of catalytic activity	0.00496	0		Bacterial invasion of epithelial cells	0	0.000834		Host Interactions of HIV factors		8.5e-15
Protein acetylation	0.0388	0		Jak-STAT signaling pathway	0	0.000913		TRIF-mediated TLR3/TLR4 signaling		1.86e-14
				NF-kappa B signaling pathway	0	0.000958		MyD88-independent cascade		2.69e-14
				Pertussis	0	0.00107		Toll Like Receptor 3 (TLR3) Cascade		2.69e-14
				Leukocyte transendothelial migration	0	0.00905		Toll Like Receptor 4 (TLR4) Cascade		1.23e-13
				Viral myocarditis	0	0.00967		Activated TLR4 signalling		2.89e-13
				Epithelial cell signaling in Helicobacter pylori infection	0	0.0102		HIV Infection		1.49e-11
				Salmonella infection	0	0.0105		Toll-Like Receptors Cascades		4.32e-11
				Natural killer cell mediated cytotoxicity	0	0.0194		Toll Like Receptor 10 (TLR10) Cascade		1.49e-10
				Prion diseases	0	0.0329		Toll Like Receptor 5 (TLR5) Cascade		1.49e-10
				Th1 and Th2 cell differentiation	0	0.043		MyD88 cascade initiated on plasma membrane		1.49e-10
				African trypanosomiasis	0	0.0436		TRAF6 mediated induction of NFkB and MAP kinases upon TLR7/8 or 9 activation		2.94e-10
				Legionellosis	0	0.0461		MAP kinase activation in TLR cascade		3.01e-10
				Leishmaniasis	0	0.0474		Toll Like Receptor 7/8 (TLR7/8) Cascade		3.98e-10
								MyD88 dependent cascade initiated on endosome		3.98e-10
								TRAF6 Mediated Induction of proinflammatory cytokines		6.21e-10
								Toll Like Receptor 9 (TLR9) Cascade		7.43e-10
								MyD88:Mal cascade initiated on plasma membrane		1.34e-09
								Toll Like Receptor TLR1:TLR2 Cascade		1.34e-09
								Toll Like Receptor TLR6:TLR2 Cascade		1.34e-09
								Toll Like Receptor 2 (TLR2) Cascade		1.34e-09
								Interleukin-1 signaling		9.79e-07

## Sheet: Supplementary Table 5
Supplementary Table 5. Demographic characteristics of the AMP-AD Diverse Cohorts donors
		Dorsolateral prefrontal cortex (dlPFC)			Superior temporal gyrus (STG)
		Non-impaired control	Alzheimer's disease		Non-impaired control	Alzheimer's disease
Total N		190	530		49	161
Sex	Male	89	213		28	85
	Female	101	317		21	76
Age	21-30	3	0		0	0
	31-40	1	0		2	0
	41-50	3	2		3	1
	51-60	17	14		5	10
	61-70	30	48		5	22
	71-80	39	109		6	50
	81-90	58	208		11	57
	90+	39	148		17	21
	Unknown	0	1		0	0
APOE genotype	e2/e2	2	1		0	0
	e2/e3	31	27		5	5
	e3/e3	115	226		37	63
	e2/e4	11	13		1	3
	e3/e4	26	216		6	71
	e4/e4	5	47		0	19
Race	White	111	262		43	70
	Black or African American	56	133		4	52
	Asian	2	4		0	0
	American Indian or Alaskan Native	0	1		0	0
	Unknown	3	0		0	0
	Other	18	130		2	39

## Sheet: Supplementary Table 6
Supplementary Table 6. Identified APOE ε4 proteins from the dorsolateral prefrontal cortex and superior temporal gyrus of AMP-AD Diverse Cohorts study
Brain Region	Uniprot ID	Protein abbreviation	Protein Name	Mutual information value
dlPFC	Q8WV28	BLNK	B cell linker	0.246673
dlPFC	Q7Z6M2	FBXO33	F-box protein 33	0.235597
dlPFC	O95059	RPP14	ribonuclease P/MRP subunit p14	0.205841
dlPFC	P01817	IGHV2-5	immunoglobulin heavy variable 2-5	0.203073
dlPFC	Q9Y467	SALL2	spalt like transcription factor 2	0.202708
dlPFC	Q96T21	SECISBP2	SECIS binding protein 2	0.20205
dlPFC	Q14146	URB2	URB2 ribosome biogenesis homolog	0.197621
dlPFC	P0CG47	UBB	ubiquitin B	0.189211
dlPFC	P20132	SDS	serine dehydratase	0.173185
dlPFC	P53539	FOSB	FosB proto-oncogene, AP-1 transcription factor subunit	0.17074
dlPFC	Q14500	KCNJ12	potassium inwardly rectifying channel subfamily J member 12	0.166997
dlPFC	Q14534	SQLE	squalene epoxidase	0.166963
dlPFC	Q8N9I5	FADS6	fatty acid desaturase 6	0.166069
dlPFC	Q99633	PRPF18	pre-mRNA processing factor 18	0.165712
dlPFC	O95445	APOM	apolipoprotein M	0.16556
dlPFC	O95476	CTDNEP1	CTD nuclear envelope phosphatase 1	0.163473
dlPFC	Q9NS40	KCNH7	potassium voltage-gated channel subfamily H member 7	0.161901
dlPFC	A1XBS5	CIBAR1	CBY1 interacting BAR domain containing 1	0.156442
dlPFC	Q2M3V2	SOWAHA	sosondowah ankyrin repeat domain family member A	0.155363
dlPFC	Q9P278	FNIP2	folliculin interacting protein 2	0.155074
dlPFC	O14519	CDK2AP1	cyclin dependent kinase 2 associated protein 1	0.154655
dlPFC	P61204	ARF3	ADP ribosylation factor 3	0.152708
dlPFC	O60814	H2BC12	H2B clustered histone 12	0.15264
dlPFC	O76074	PDE5A	phosphodiesterase 5A	0.152397
dlPFC	Q9BQL6	FERMT1	FERM domain containing kindlin 1	0.1487
dlPFC	Q96PM9	ZNF385A	zinc finger protein 385A	0.14858
dlPFC	Q6UXK5	LRRN1	leucine rich repeat neuronal 1	0.147884
dlPFC	O95347	SMC2	structural maintenance of chromosomes 2	0.144519
dlPFC	Q9P0B6	CCDC167	coiled-coil domain containing 167	0.14346
dlPFC	Q96CM3	RPUSD4	RNA pseudouridine synthase D4	0.143316
dlPFC	Q15569	TESK1	testis associated actin remodelling kinase 1	0.142603
dlPFC	Q9H201	EPN3	epsin 3	0.142255
dlPFC	P49848	TAF6	TATA-box binding protein associated factor 6	0.139567
dlPFC	Q15125	EBP	EBP cholestenol delta-isomerase	0.139372
dlPFC	Q9UHR6	ZNHIT2	zinc finger HIT-type containing 2	0.138961
dlPFC	A0A075B6S5	IGKV1-27	immunoglobulin kappa variable 1-27	0.138879
dlPFC	Q8NBZ7	UXS1	UDP-glucuronate decarboxylase 1	0.13846
dlPFC	P51828	ADCY7	adenylate cyclase 7	0.13839
dlPFC	Q9NVC6	MED17	mediator complex subunit 17	0.13725
dlPFC	Q9BVI4	NOC4L	nucleolar complex associated 4 homolog	0.135454
dlPFC	Q9Y2P8	RCL1	RNA terminal phosphate cyclase like 1	0.133436
dlPFC	P08493	MGP	matrix Gla protein	0.132567
dlPFC	Q9NUX5	POT1	protection of telomeres 1	0.130874
dlPFC	Q13488	TCIRG1	T cell immune regulator 1, ATPase H+ transporting V0 subunit a3	0.129612
dlPFC	Q05BV3	EML5	EMAP like 5	0.128819
dlPFC	Q9Y613	FHOD1	formin homology 2 domain containing 1	0.128767
dlPFC	P20851	C4BPB	complement component 4 binding protein beta	0.128001
dlPFC	Q5T7V8	GORAB	golgin, RAB6 interacting	0.12727
dlPFC	Q15464	SHB	SH2 domain containing adaptor protein B	0.1265
dlPFC	Q8TAP6	CEP76	centrosomal protein 76	0.126284
dlPFC	Q9BX74	TM2D1	TM2 domain containing 1	0.125452
dlPFC	Q96CW6	SLC7A6OS	solute carrier family 7 member 6 opposite strand	0.123981
dlPFC	P57764	GSDMD	gasdermin D	0.121879
dlPFC	Q15040	JOSD1	Josephin domain containing 1	0.121487
dlPFC	Q7Z2E3	APTX	aprataxin	0.121256
dlPFC	P00973	OAS1	2'-5'-oligoadenylate synthetase 1	0.119873
dlPFC	Q9Y219	JAG2	jagged canonical Notch ligand 2	0.119655
dlPFC	Q13519	PNOC	prepronociceptin	0.119625
dlPFC	Q9H8G1	ZNF430	zinc finger protein 430	0.118202
dlPFC	P01593	IGKV1D-33	immunoglobulin kappa variable 1D-33	0.116734
dlPFC	P00746	CFD	complement factor D	0.115923
dlPFC	Q9Y6J9	TAF6L	TATA-box binding protein associated factor 6 like	0.115815
dlPFC	O75954	TSPAN9	tetraspanin 9	0.11542
dlPFC	P36980	CFHR2	complement factor H related 2	0.114516
dlPFC	A8MPS7	YDJC	YdjC chitooligosaccharide deacetylase homolog	0.113315
dlPFC	Q6UB28	METAP1D	methionyl aminopeptidase type 1D, mitochondrial	0.113164
dlPFC	P15502	ELN	elastin	0.113007
dlPFC	P42229	STAT5A	signal transducer and activator of transcription 5A	0.11299
dlPFC	Q659C4	LARP1B	La ribonucleoprotein 1B	0.112676
dlPFC	O14817	TSPAN4	tetraspanin 4	0.1125
dlPFC	Q13087	PDIA2	protein disulfide isomerase family A member 2	0.111693
dlPFC	Q9H9F9	ACTR5	actin related protein 5	0.111133
dlPFC	Q96CG8	CTHRC1	collagen triple helix repeat containing 1	0.110706
dlPFC	Q8N3G9	TMEM130	transmembrane protein 130	0.107375
dlPFC	O75911	DHRS3	dehydrogenase/reductase 3	0.10732
dlPFC	Q5BJH2	TMEM128	transmembrane protein 128	0.106797
dlPFC	O14893	GEMIN2	gem nuclear organelle associated protein 2	0.105685
dlPFC	Q9H6J7	CSTPP1	centriolar satellite-associated tubulin polyglutamylase complex regulator 1	0.105681
dlPFC	P56159	GFRA1	GDNF family receptor alpha 1	0.104233
dlPFC	Q8IZ73	RPUSD2	RNA pseudouridine synthase domain containing 2	0.104171
dlPFC	Q6T4R5	NHS	NHS actin remodeling regulator	0.103389
dlPFC	O95967	EFEMP2	EGF containing fibulin extracellular matrix protein 2	0.102484
dlPFC	Q2M3G4	SHROOM1	shroom family member 1	0.101724
dlPFC	Q8TCT1	PHOSPHO1	phosphoethanolamine/phosphocholine phosphatase 1	0.10116
dlPFC	Q96S86	HAPLN3	hyaluronan and proteoglycan link protein 3	0.101153
STG	Q5T890	ERCC6L2	ERCC excision repair 6 like 2	0.316294
STG	Q6ZWJ1	STXBP4	syntaxin binding protein 4	0.315205
STG	Q14554	PDIA5	protein disulfide isomerase family A member 5	0.303677
STG	Q9Y2S2	CRYL1	crystallin lambda 1	0.28545
STG	Q96SU4	OSBPL9	oxysterol binding protein like 9	0.284451
STG	Q3KRA6	C2orf76	chromosome 2 open reading frame 76	0.25254
STG	Q01118	SCN7A	sodium voltage-gated channel alpha subunit 7	0.247029
STG	Q09328	MGAT5	alpha-1,6-mannosylglycoprotein 6-beta-N-acetylglucosaminyltransferase	0.246021
STG	Q93062	RBPMS	RNA binding protein, mRNA processing factor	0.189867
STG	Q15653	NFKBIB	NFKB inhibitor beta	0.177856
STG	Q5T7V8	GORAB	golgin, RAB6 interacting	0.177856
STG	P50479	PDLIM4	PDZ and LIM domain 4	0.164637
STG	Q8IXF0	NPAS3	neuronal PAS domain protein 3	0.164637
STG	Q8IYM9	TRIM22	tripartite motif containing 22	0.161067
STG	Q9NWM0	SMOX	spermine oxidase	0.161067
STG	Q13643	FHL3	four and a half LIM domains 3	0.158313
STG	O15069	NACAD	NAC alpha domain containing	0.154931
STG	P48637	GSS	glutathione synthetase	0.154931
STG	P49918	CDKN1C	cyclin dependent kinase inhibitor 1C	0.154931
STG	Q7Z406	MYH14	myosin heavy chain 14	0.154931
STG	Q9Y548	YIPF1	Yip1 domain family member 1	0.154931
STG	P24593	IGFBP5	insulin like growth factor binding protein 5	0.146544
STG	Q9P1Z0	ZBTB4	zinc finger and BTB domain containing 4	0.146544
STG	Q14142	TRIM14	tripartite motif containing 14	0.146544
STG	Q9BXJ0	C1QTNF5	C1q and TNF related 5	0.146544
STG	Q9NX70	MED29	mediator complex subunit 29	0.145852
STG	Q5BKT4	ALG10	ALG10 alpha-1,2-glucosyltransferase	0.139019
STG	Q6NXT4	SLC30A6	solute carrier family 30 member 6	0.139019
STG	Q99986	VRK1	VRK serine/threonine kinase 1	0.139019
STG	Q9P2F5	STOX2	storkhead box 2	0.139019
STG	O95562	SFT2D2	SFT2 domain containing 2	0.137325
STG	P49281	SLC11A2	solute carrier family 11 member 2	0.137325
STG	Q14449	GRB14	growth factor receptor bound protein 14	0.137325
STG	Q8TCT1	PHOSPHO1	phosphoethanolamine/phosphocholine phosphatase 1	0.137325
STG	Q96S53	TESK2	testis associated actin remodelling kinase 2	0.137325
STG	Q9BRR3	PGAP4	post-GPI attachment to proteins GalNAc transferase 4	0.137325
STG	Q9BV29	CCDC32	coiled-coil domain containing 32	0.137325
STG	Q9BX59	TAPBPL	TAP binding protein like	0.137325
STG	Q9Y3S2	ZNF330	zinc finger protein 330	0.137325
STG	Q9H2V7	SPNS1	SPNS lysolipid transporter 1, lysophospholipid	0.135544
STG	O15231	ZNF185	zinc finger protein 185 with LIM domain	0.132765
STG	O60437	PPL	periplakin	0.132765
STG	P02788	LTF	lactotransferrin	0.132765
STG	P32019	INPP5B	inositol polyphosphate-5-phosphatase B	0.132765
STG	P50895	BCAM	basal cell adhesion molecule (Lutheran blood group)	0.132765
STG	Q5TD97	FHL5	four and a half LIM domains 5	0.132765
STG	Q9NZ09	UBAP1	ubiquitin associated protein 1	0.132765
STG	A0A0U1RRK4	LBHD2	LBH domain containing 2	0.129283
STG	O14879	IFIT3	interferon induced protein with tetratricopeptide repeats 3	0.129283
STG	P60033	CD81	CD81 molecule	0.129283
STG	P60602	ROMO1	reactive oxygen species modulator 1	0.129283
STG	Q13464	ROCK1	Rho associated coiled-coil containing protein kinase 1	0.129283
STG	Q53ET0	CRTC2	CREB regulated transcription coactivator 2	0.129283
STG	Q9BRP4	PAAF1	proteasomal ATPase associated factor 1	0.129283
STG	Q9H1K6	TLNRD1	talin rod domain containing 1	0.129283
STG	Q9Y2D0	CA5B	carbonic anhydrase 5B	0.129283

## Sheet: Supplementary Table 7
Supplementary Table 7. Functional enrichment analyses for APOE ε4 proteins from the dorsolateral prefrontal cortex and superior temporal gyrus of AMP-AD Diverse Cohorts study
PANTHER Biological Processes				KEGG Immune-Related Pathways				Reactome Immune-Related Pathways
Pathway	dlPFC FDR	STG FDR		Pathway	dlPFC FDR	STG FDR		Pathway	dlPFC FDR	STG FDR
Viral process	3.95e-17	2.18e-18		Viral carcinogenesis	5.63e-22	3.19e-16		Immune System	4.06e-10	7.42e-10
Transcription by RNA polymerase II	7.08e-13	5.53e-13		Epstein-Barr virus infection	1.37e-13	2.31e-27		Signaling by the B Cell Receptor (BCR)	2.25e-07	5.31e-16
Negative regulation of apoptotic process	3.29e-11	3.09e-06		Th1 and Th2 cell differentiation	2.39e-13	0.000208		Adaptive Immune System	3.76e-07	6.1e-09
Chromatin remodeling	3.29e-11	0.0404		HTLV-I infection	7.85e-13	2.33e-09		HIV-1 Transcription Initiation	0.000228	2.04e-06
Rhythmic process	1.03e-06	2.33e-08		Th17 cell differentiation	1.72e-11	2.16e-06		RNA Polymerase II HIV-1 Promoter Escape	0.000228	2.04e-06
Regulation of DNA_binding transcription factor activity	0.000139	0.000542		T cell receptor signaling pathway	8.29e-11	1.33e-05		TRAF6 mediated NF-kB activation	0.000254	4.22e-11
RNA splicing	0.000208	2.39e-11		Hepatitis B	1.53e-10	1.72e-13		HIV Infection	0.000462	6.48e-13
Transcription, DNA_templated	0.000597	4.88e-12		Measles	3.65e-09	7.5e-13		Downstream Signaling Events Of B Cell Receptor (BCR)	0.00127	3.98e-16
Protein folding	0.000639	0.0476		B cell receptor signaling pathway	9.68e-09	4.2e-07		Signaling by TGF-beta Receptor Complex	0.00142	3.89e-07
Regulation of cell cycle	0.000658	6.44e-07		Kaposi's sarcoma-associated herpesvirus infection	8.05e-08	2.33e-08		RIP-mediated NFkB activation via DAI	0.00142	1.85e-07
Regulation of transcription by RNA polymerase II	0.000789	0.0311		Hepatitis C	2.54e-07	1.88e-11		HIV Life Cycle	0.00221	4.63e-06
MRNA processing	0.0114	4.46e-10		NF-kappa B signaling pathway	4.78e-07	0.000152		DAI mediated induction of type I IFNs	0.00388	1.53e-09
MRNA splicing, via spliceosome	0.0173	1.82e-16		IL-17 signaling pathway	1.74e-06	4.07e-08		TAK1 activates NFkB by phosphorylation and activation of IKKs complex	0.0134	1.22e-06
Protein phosphorylation	0.0283	2.44e-07		TNF signaling pathway	2.86e-06	0.000452		Activation of NF-kappaB in B Cells	0.019	2.26e-19
DNA recombination	2.67e-13	-		Leishmaniasis	3.57e-05	0.0316		Late Phase of HIV Life Cycle	0.02	1.04e-06
DNA repair	3.31e-11	-		Epithelial cell signaling in Helicobacter pylori infection	4.1e-05	0.00182		Signaling by Interleukins	2.91e-15	-
Chromatin organization	2.09e-09	-		Shigellosis	0.000328	2.97e-09		Interleukin-3, 5 and GM-CSF signaling	2.31e-11	-
Cell cycle	9.83e-08	-		Pathogenic Escherichia coli infection	0.000718	0.000331		Cytokine Signaling in Immune system	4.06e-10	-
Cell proliferation	3.28e-06	-		Toxoplasmosis	0.001	0.000607		Antigen Activates B Cell Receptor Leading to Generation of Second Messengers	4.32e-09	-
Apoptotic process	6.72e-05	-		Adipocytokine signaling pathway	0.00203	0.00015		Interleukin-2 signaling	3.24e-07	-
Heart development	0.00292	-		Chemokine signaling pathway	0.00329	0.00924		Fcgamma receptor (FCGR) dependent phagocytosis	1.15e-06	-
Glycolytic process	0.00319	-		Influenza A	0.00508	4.41e-05		Interleukin receptor SHC signaling	1.99e-05	-
Protein methylation	0.0117	-		Chagas disease (American trypanosomiasis)	0.00556	6.24e-05		DAP12 signaling	3.96e-05	-
DNA replication	0.0163	-		Tuberculosis	0.00589	0.0109		Regulation of IFNG signaling	5.62e-05	-
Blood coagulation	0.0413	-		Bacterial invasion of epithelial cells	0.0105	0.0114		Interleukin-6 signaling	9.87e-05	-
Gluconeogenesis	0.0432	-		NOD-like receptor signaling pathway	0.0109	4.57e-06		Innate Immune System	0.000104	-
RNA metabolic process	-	1.19e-16		Pertussis	0.0125	2.41e-05		DAP12 interactions	0.000254	-
7_methylguanosine mRNA capping	-	8.62e-09		TGF-beta signaling pathway	0.024	0.000703		Interleukin-7 signaling	0.000254	-
Endoderm development	-	0.00239		Leukocyte transendothelial migration	0.0258	0.0116		GPVI-mediated activation cascade	0.000558	-
Regulation of binding	-	0.00349		Jak-STAT signaling pathway	1.92e-09	-		TCR signaling	0.00063	-
Response to toxic substance	-	0.00823		Fc epsilon RI signaling pathway	1.14e-05	-		Interferon gamma signaling	0.000887	-
Cell_matrix adhesion	-	0.0143		Primary immunodeficiency	0.00124	-		Transcription of the HIV genome	0.00164	-
Circadian rhythm	-	0.0392		Platelet activation	0.00328	-		Interleukin-1 signaling	0.0077	-
Immune system process	-	0.0417		Fc gamma R-mediated phagocytosis	0.00999	-		Interferon alpha/beta signaling	0.00888	-
				Vibrio cholerae infection	0.0116	-		Regulation of IFNA signaling	0.0102	-
				Antigen processing and presentation	0.0137	-		Integrin alphaIIb beta3 signaling	0.0102	-
				RIG-I-like receptor signaling pathway	-	2.42e-10		TGF-beta receptor signaling activates SMADs	0.02	-
				Toll-like receptor signaling pathway	-	2.78e-07		CD28 co-stimulation	0.02	-
				Salmonella infection	-	0.00122		TRAF6 mediated induction of NFkB and MAP kinases upon TLR7/8 or 9 activation	0.0231	-
				Legionellosis	-	0.00133		Costimulation by the CD28 family	0.0231	-
								Vpu mediated degradation of CD4	-	1.89e-13
								RIG-I/MDA5 mediated induction of IFN-alpha/beta pathways	-	7.71e-10
								Vif-mediated degradation of APOBEC3G	-	9.8e-10
								Abortive elongation of HIV-1 transcript in the absence of Tat	-	1.15e-08
								Cytosolic sensors of pathogen-associated DNA	-	1.35e-08
								Antigen processing-Cross presentation	-	8.14e-08
								Pausing and recovery of Tat-mediated HIV-1 elongation	-	8.81e-08
								Tat-mediated HIV-1 elongation arrest and recovery	-	8.81e-08
								TRIF-mediated TLR3/TLR4 signaling	-	1.04e-07
								MyD88-independent cascade	-	1.27e-07
								Toll Like Receptor 3 (TLR3) Cascade	-	1.27e-07
								HIV-1 elongation arrest and recovery	-	1.28e-07
								Pausing and recovery of HIV-1 elongation	-	1.28e-07
								Host Interactions of HIV factors	-	1.49e-07
								Activated TLR4 signalling	-	1.18e-06
								Formation of the HIV-1 Early Elongation Complex	-	1.75e-06
								Toll Like Receptor 4 (TLR4) Cascade	-	1.93e-06
								TRAF6 Mediated Induction of proinflammatory cytokines	-	2.01e-06
								TRAF3-dependent IRF activation pathway	-	2.35e-06
								Class I MHC mediated antigen processing & presentation	-	5.04e-06
								Tat-mediated elongation of the HIV-1 transcript	-	5.94e-06
								Formation of HIV-1 elongation complex containing HIV-1 Tat	-	5.94e-06

## Sheet: Supplementary Table 8
Supplementary Table 8. Identified APOE ε4 proteins from cortical organoids at four weeks and eight weeks
4 Week Timepoint				8 Week Timepoint
Protein	logFC	adj.P.Val		Protein	logFC	adj.P.Val
CLK1	2.5687	0.000751033		HSD11B1L	2.16648	1.03775e-06
LMO4	-1.74432	0.000751033		RPE65	3.01135	9.73541e-06
CLK4	2.37453	0.00135055		FAM199X	2.1501	1.64745e-05
CSNK1D	2.42885	0.00162897		TTR	4.38511	1.70451e-05
MPV17	1.34423	0.00162897		SLC22A5	1.98464	1.70451e-05
TMEM267	1.35957	0.00189849		KCTD8	3.31326	1.70451e-05
CNIH4	1.56104	0.0019302		ETFDH	3.00574	1.70451e-05
MAGED2	-0.912628	0.00263832		ATP2B3	3.0216	2.35018e-05
ZCCHC8	-1.00534	0.00263832		ATP11C	2.39455	2.44436e-05
UGCG	-1.77768	0.00306285		C1QTNF5	3.37496	2.44436e-05
MSRB2	-1.99041	0.00351601		TMCO3	3.311	3.55471e-05
LGMN	-1.64264	0.00351601		TMEM267	1.74974	4.16415e-05
DPY30	-1.09991	0.00351601		DOCK6	-1.50642	5.54759e-05
TCF7L1	-1.92115	0.00351601		TBC1D24	1.25486	8.39193e-05
NFYC	-0.92626	0.00351601		RSPH4A	2.46436	9.49867e-05
CLPP	0.919975	0.00372483		LRP1B	2.69538	9.49867e-05
IDH3B	1.21623	0.00378691		SALL2	-1.78753	9.69905e-05
ARSG	-1.56083	0.00384591		H1-6	-1.99961	0.00010542
SCPEP1	-1.70706	0.00417135		FARS2	1.58671	0.00010542
FAM168B	1.46821	0.00417135		PCP4	5.21454	0.00010542
RAB24	1.04725	0.00417135		HK1	1.39566	0.000129888
MTERF1	-1.03467	0.00417135		EPB41L4B	1.35384	0.000129888
HSD11B1L	0.877489	0.00417135		CALML4	2.82024	0.000129888
CSNK1G2	0.894852	0.00417135		ZZEF1	1.17499	0.000131337
SLC25A38	0.875054	0.00434049		SLC20A2	1.91589	0.000138285
TSPAN2	1.38292	0.00440987		CLK1	2.2851	0.000138285
SAT2	1.19539	0.00440987		GATAD2A	-1.23693	0.00015761
SESN2	0.993618	0.00440987		CLK4	2.34006	0.000171069
CKM;cRAP-CKM	2.16018	0.00485334		PYGM	3.56638	0.000171069
MAD2L2	-1.02624	0.00498648		SMARCC1	-1.81909	0.000171069
NAF1	-1.11	0.00545199		TCF7L1	-2.29519	0.000194386
RNF41	1.30657	0.00545199		SAT2	1.54129	0.000194386
MRE11	-0.662878	0.0055606		P4HTM	1.67203	0.000194386
CISD1	1.38353	0.00585334		HPX	4.95085	0.000194386
KIAA0232	0.774551	0.00598602		ACO2	1.4539	0.000194386
SDHD	0.847858	0.00717841		MRE11	-0.870761	0.000221423
AP1S1	0.988711	0.00719071		NEK3	-1.4169	0.000221423
SELENOT	1.2263	0.00719071		SNTA1	1.66328	0.000221423
SS18	-1.06645	0.00790116		RAB24	1.28455	0.000221423
SRSF8	1.35735	0.00799334		POMP	-1.63767	0.000229468
BCL7C	-0.732654	0.00813273		OGDHL	3.49238	0.000240921
OSBPL2	0.812512	0.00813273		VPS13C	0.931868	0.000240921
MT-CYB	1.60028	0.00820125		SS18	-1.44101	0.000240921
SINHCAF	-1.22257	0.00820125		KCNJ13	1.70063	0.000257447
UBE2H	-1.51726	0.00823254		CALB1	3.23526	0.000257447
VPS26C	0.664679	0.00827386		PPP1R12A	-0.818892	0.000265621
RALA	0.837339	0.00853763		PRNP	2.53988	0.000265621
CSNK1E	0.870752	0.00857675		SELENOO	1.00168	0.000265621
TMEM120B	1.50102	0.00857675		SALL4	-2.55411	0.000285497
MSH4	3.76704	0.00861077		HECTD3	0.939429	0.000293827
RAC3	2.75498	0.00861077		EPB41L4A	1.54878	0.000296922
DDB2	0.988122	0.00861077		MLYCD	1.42814	0.000302199
PIK3CD	1.3728	0.00861077		ZCCHC8	-1.03964	0.000302199
SLC25A25	1.52243	0.00902494		GRAMD2B	1.67449	0.000312301
GGT7	0.94937	0.00902494		D2HGDH	1.19116	0.000329576
ABCA2	0.973408	0.00918747		UVRAG	1.16114	0.000335513
NEK3	-0.976104	0.00931731		IDH3B	1.3504	0.000335513
CDK2AP1	-1.37733	0.00944441		CC2D1A	1.35009	0.000335513
RPL38	-0.806952	0.00944441		SOD3	3.17009	0.000335513
CDC42SE2	1.92677	0.01003		RCC2	-1.47221	0.00034375
RPL39;RPL39P5	-0.881856	0.01003		AKTIP	0.933122	0.00034375
POLR2L	-0.754773	0.0100722		GRM8	2.3961	0.000357034
PEX11A	1.47261	0.0100911		AMPD2	1.40729	0.000357855
CRIPT	-0.909909	0.0105287		NASP	-1.65848	0.000357855
ARL6IP5	1.06337	0.0105287		TMEM30A	1.56706	0.000357855
TMEM205	1.42328	0.0105473		PITRM1	1.08082	0.000357855
CNPY3	-0.874512	0.0106327		TBL1XR1	-0.931555	0.000357855
UBE2G2	0.750613	0.0106846		SLU7	-0.952817	0.000357855
CDC123	-0.77271	0.0108452		STIM2	1.56193	0.000357855
AMPD2	1.01722	0.0110553		CSNK1E	1.11919	0.000368661
CAMK2G	0.813243	0.0111319		PPP1R3G	2.35737	0.000368661
SELENOO	0.686046	0.0112968		CWF19L2	-0.977549	0.000368661
RPS19	-0.909211	0.0115911		TBC1D9	1.04989	0.000368661
GDE1	0.731121	0.0116532		HTR2C	3.06797	0.000369128
ANKRD16	0.667677	0.0117422		GALNT18	2.44152	0.000369128
ENDOG	-0.84875	0.0117422		SYNE1	1.27667	0.000369128
PRKAB2	1.15503	0.012069		WEE1	-1.4802	0.000369128
CRIP1	-2.05125	0.012069		SNTB2	1.15063	0.000369128
UBL5	-0.801239	0.0122539		SEC14L2	2.95074	0.000393083
NOCT	0.83762	0.0122539		MAST3	1.46535	0.000394289
MT-ATP8	1.1398	0.0123211		MTHFR	1.52582	0.000394289
CKS1B	-1.65488	0.0125505		IQCE	1.52161	0.000394289
TMED8	0.863168	0.0125505		PLCD4	-1.85566	0.000397114
MAST2	0.652182	0.0125505		GMPR	2.57055	0.000405929
RAP2A	1.13143	0.0126032		HDAC1	-1.01796	0.000405929
SCRN1	0.79878	0.0127218		SLC25A38	0.966304	0.000405929
MCL1	-1.07318	0.0128803		FBXW9	1.86481	0.000405929
PSME3	-0.991338	0.0128803		WDHD1	-1.88639	0.000405929
RRAGA	0.86153	0.0128803		SLC35C1	1.54564	0.000405929
CLCC1	0.88598	0.0128803		MSRB2	-2.02713	0.000405929
PPP4R3B	-1.05222	0.0128803		EPB41L2	-1.08422	0.000405929
NOL3	1.58558	0.0129426		CDC123	-1.02016	0.000405929
GPCPD1	-1.17183	0.0129775		LGALS3BP	2.85646	0.000405929
EIF2B2	0.669137	0.0129775		LY6H	2.38648	0.000412722
ACSS1	1.54412	0.012995		MT-CYB	1.95	0.000426659
CSTF2	-0.637745	0.0131688		SLC12A2	1.29279	0.000435117
NAT14	1.14705	0.0132445		DISP1	3.0992	0.00043645
CNEP1R1	0.897077	0.0132445		SURF1	1.22256	0.00043645
ID1	-1.60781	0.0134812		RAD50	-0.721046	0.00043645
LSM7	-0.873541	0.0140764		ACAD10	1.19658	0.000440619
RPL36A	-0.710698	0.0141398		CLN6	-1.61678	0.000440619
TMEM222	1.33841	0.0141398		CCDC117	-1.09988	0.000472813
MTERF3	-0.868405	0.0141398		CD302	1.21004	0.000472813
TBL1XR1	-0.634214	0.0141398		IDNK	2.24413	0.000472813
BLOC1S4	0.901267	0.0141398		LRRC8D	-1.1632	0.000472813
SYS1	1.16892	0.0141759		RSPH3	1.74511	0.000472813
KRIT1	-1.60572	0.0142267		NME3	1.56109	0.000472813
ANP32A	-0.835926	0.0144764		TACC3	-1.58141	0.000472813
ALS2	0.636434	0.014552		SLC25A4	1.90247	0.000472813
TBC1D24	0.659605	0.0146408		EGLN1	1.6046	0.000475929
RHBDD1	0.807793	0.0146762		ZMYM1	-0.932563	0.000478625
CYP2U1	1.30739	0.0146762		GALC	1.39704	0.000478625
FRZB	1.81046	0.0146762		SULF1	2.74094	0.000478625
DUSP3	0.748121	0.0148861		JMJD7	1.21675	0.000480409
TTC9C	0.791112	0.0148861		SLC25A12	1.13871	0.000488463
NCOA7	1.1644	0.0148861		ABTB3	1.56708	0.00048904
EFNA5	-1.45554	0.0151896		SIK3	1.08882	0.00048904
ELOA	-0.623276	0.0151979		NFYC	-0.91737	0.00049851
SEC22A	1.43811	0.0153307		SKA3	-2.06165	0.000507451
NDUFA4	-1.50881	0.0153307		CHEK2	-1.09144	0.000507451
VAPA	0.727838	0.0153307		CDC42EP1	-2.17902	0.000520385
CRADD	1.15332	0.0160974		DLGAP5	-2.25732	0.000520385
MEAF6	-0.797044	0.0160974		UBXN10	1.68918	0.000520385
PAIP2	-1.47304	0.0160974		ELOA	-0.854857	0.000544669
NBN	-0.714684	0.0161082		GFM1	0.845433	0.000546643
SLC25A42	1.20498	0.0163294		ACAT1	1.1993	0.000546643
CEP89	2.01312	0.0163294		TMEM184C	1.09003	0.000559901
RAP2B	1.51107	0.0163802		GAS6	1.01455	0.000566299
AVEN	-0.807532	0.0169818		UXT	-0.703401	0.000569586
BPGM	0.827314	0.0172565		CASKIN1	1.15008	0.000569586
FBXL15	0.778498	0.0174087		CNNM2	1.45844	0.000571307
INO80C	-0.973657	0.0174087		GPCPD1	-1.52519	0.000578586
RAB29	1.89811	0.0174087		GALNT11	2.04432	0.000578586
MAST3	0.971355	0.0174087		TBC1D15	-0.750298	0.000581563
PTMA	-1.03396	0.0174087		PHF3	-0.873589	0.000588904
CTSZ	-2.13724	0.0174087		LRFN3	1.28168	0.000590722
SLC25A44	1.21526	0.0174087		PCDH1	-1.75143	0.00059817
RAD1	1.19361	0.0176139		NFU1	0.927675	0.000599229
RPIA	-0.787367	0.0176139		SLC4A10	2.92506	0.000603718
B2M;cRAP-B2M	2.96893	0.0176139		NAXD	1.07497	0.000604518
MTSS1	1.0596	0.0176139		FMNL3	-1.92775	0.000614581
TMEM120A	1.12167	0.0176139		CAB39L	1.8058	0.000616714
PKP4	0.912077	0.0176139		APOL2	1.31797	0.000616714
RAB1B	1.19966	0.0176139		IREB2	1.64049	0.000617167
POMP	-0.967916	0.0176139		IARS2	0.982469	0.000617167
SEC63	0.839817	0.0176139		BCAR1	-1.13068	0.000620936
GTF2A2	-1.33898	0.0176644		PYGB	0.874476	0.000642867
UBE2E2	-0.79268	0.0179365		DNAJC2	-0.847034	0.000645945
COPS3	0.68722	0.0179365		NDUFA4L2	1.45491	0.000651784
G3BP1	-0.787538	0.0179365		ZNF217	-0.88939	0.000651784
TUBB8	1.43002	0.0179365		MAD2L2	-1.0654	0.000651784
EMC8	0.736417	0.0180138		LRRTM4	2.46378	0.000651784
SIX5	-0.949522	0.0180138		STK11IP	1.26537	0.000651784
IMPACT	-0.659356	0.0180138		ABHD17B	0.843799	0.000651784
POLR2K	-0.75597	0.0180138		CFAP52	1.84694	0.000651784
CDK5	0.921983	0.0180138		GPATCH4	-1.19695	0.000651784
ABHD17B	0.607621	0.0180198		RSPH9	1.39022	0.000651784
RAB35	0.921037	0.0180364		MPC2	1.86101	0.000651784
TMUB1	0.943557	0.0180364		LGMN	-1.52724	0.000668504
BANF1	-1.00735	0.0180364		CSTF2T	-0.76921	0.000676359
RCHY1	0.749079	0.0180364		OPA3	1.12556	0.000682507
PLAGL2	0.755929	0.0180364		DHRS1	1.65329	0.000696052
NASP	-1.04361	0.0180364		AK1	1.01464	0.000696052
NFYA	1.21642	0.0180449		PARN	-0.838906	0.000696052
CLN8	1.23267	0.0180449		ADD1	0.696922	0.000704737
SET	-0.858179	0.0186898		NRN1	2.30136	0.00072966
ODC1	-2.54641	0.0187042		SLC25A29	1.82181	0.000730408
GSTM4	-1.92396	0.0187139		MDH2	1.02146	0.0007312
VPS35L	0.558134	0.0187139		PTGES2	1.10173	0.000733822
MGMT	-1.18915	0.0187139		ABCA2	1.11186	0.000733822
FAM50A	0.607916	0.0187139		HEXIM1	-1.23333	0.000733822
WDR20	0.597009	0.0188438		CABLES1	1.89937	0.000733822
WDR45B	0.721728	0.0188438		MCMBP	-1.17555	0.000733822
TNPO2	0.691633	0.0188438		SLC5A3	1.70087	0.000733822
H1-6	-1.01564	0.0188438		MKI67	-1.79397	0.000733822
PRKAG2	1.10935	0.0188438		CSTF3	-0.740511	0.000733822
SC5D	1.03727	0.0188438		RAB34	2.66763	0.000735267
TOMM22	0.713228	0.0188438		ARFIP2	0.867229	0.000735267
TRAPPC1	-0.660535	0.0188438		ACVR1	-1.85743	0.000735267
PPP2R2D	0.936055	0.0189388		NEPRO	-0.714008	0.000762602
LRRC75A	1.66317	0.0189388		BIRC5	-1.90226	0.000800246
RAB30	1.46122	0.0189388		SYN2	1.73078	0.000837528
PIK3R1	0.827366	0.0191012		TXNRD2	1.63053	0.000839329
PRNP	1.48721	0.0193087		NDOR1	1.00748	0.000840008
ACBD5	0.879729	0.0194085		CAMK2G	0.950643	0.000840008
RIPK2	-1.59778	0.0194612		WDR33	-0.737447	0.000841146
WASHC2A	0.657946	0.0195933		DHPS	-1.1558	0.000843333
ZBTB9	-0.820609	0.0195933		SLC4A2	2.59946	0.00084575
VASN	-2.32143	0.0195996		SDHD	0.885445	0.000853742
AUP1	0.698644	0.0197411		CHKB	1.06437	0.000853742
SLC25A51	0.957525	0.0202981		SENP5	-1.69803	0.000853742
MPC2	1.29485	0.0202981		STAT5B	-1.25262	0.000853742
DERA	-0.617442	0.0207333		PLXND1	-1.68142	0.000853742
VPS25	-0.643357	0.0207333		SUCLA2	0.964959	0.000876821
COMMD5	0.593294	0.0208963		TSPAN2	1.34114	0.000876821
DOCK6	-0.687514	0.0209467		WDR12	-1.13476	0.000877607
RAD50	-0.46126	0.0209467		PDK1	1.24241	0.000889206
RARS2	-0.628308	0.0209467		CAMK2B	2.5883	0.000889206
ZER1	-0.85221	0.0210453		CA2;cRAP-CA2	3.04431	0.000889206
MED19	0.79358	0.0210859		MTA3	-1.18613	0.00089013
FHIP1B	0.550847	0.0211227		ABCB8	1.26181	0.00089013
RUSF1	1.06839	0.0211358		POMGNT2	1.22173	0.000917738
CHCHD5	-1.1976	0.0211358		HSF1	-0.825973	0.000923319
DNAJC17	-0.67313	0.0211358		BACC1	-0.778138	0.000923319
NFKBIE	0.537421	0.0211358		ACOX3	1.08472	0.000923319
NKIRAS1	0.762587	0.0211358		KIF19	-0.863844	0.000926587
TCF3	-0.90672	0.0211358		TPX2	-1.70326	0.000926587
NOP53	-0.696828	0.0211358		HMGB2	-1.32588	0.000926587
REXO4	0.708166	0.0211358		CHKA	1.22938	0.000952119
TTR	1.68311	0.0211358		PVALB	3.55925	0.000954151
GTF2A1	-0.739444	0.0211358		PRND	1.20581	0.000979224
SLC35C1	0.965149	0.0211358		NVL	-0.853552	0.000980511
CYCS;cRAP-CYCS	1.59076	0.0213028		MCOLN1	1.85204	0.000983693
GLRX5	-0.65239	0.0213028		RCOR1	-0.824459	0.000996614
ISYNA1	-0.729404	0.0213028		PTPN2	-0.678762	0.00100438
USP11	-1.0761	0.0214187		UBXN7	-0.809277	0.00101037
PAQR4	1.37227	0.0216893		IDH3A	1.51358	0.00102298
NPRL2	0.649689	0.0216893		CARS2	1.06817	0.0010322
AP5S1	0.915336	0.0216893		PRKAR2A	0.938921	0.00103805
RPS11	-0.542272	0.0216893		ZFAND1	-0.805414	0.00103805
MORF4L1	-0.596102	0.0219123		ABLIM1	1.28591	0.0010466
RRP8	0.901695	0.0219123		PRKCQ	1.99116	0.0010466
CAT;cRAP-CAT	1.9008	0.0219123		FBXL2	1.14341	0.00106628
TUSC3	0.837769	0.0219123		SINHCAF	-1.27128	0.00106628
HSF1	-0.590422	0.0219123		GCLC	1.7068	0.00106628
LSM8	-0.729302	0.0219123		ATF7IP	-0.845148	0.00106628
EPHA2	1.28395	0.0219123		ATP6V0A1	1.24424	0.00108504
SURF4	1.48904	0.0219123		CMBL	1.05546	0.00108504
JMJD4	0.594849	0.0219123		CYB5D2	1.74372	0.00108511
FKBP1B	0.983838	0.0219123		MPP2	1.14422	0.00109602
TMEM184C	0.711999	0.021944		JAG1	-1.90813	0.00110591
DERPC	-0.568426	0.0220575		PDE2A	1.87761	0.00110989
H1-0	1.25857	0.0220575		MTSS2	0.674603	0.00113874
BRF2	0.872422	0.0222301		PPP2R2D	1.21432	0.00113874
TRIM59	-1.27511	0.0222567		LMF1	1.71718	0.00113874
ROR1	-1.0169	0.0222738		IBA57	1.30241	0.00113874
ENO2	1.31927	0.0223504		CNBP	-0.809628	0.00113874
GAN	0.635206	0.0226028		ZNF593	-0.873347	0.00113942
CRAT	1.26081	0.0227704		SNTB1	2.70626	0.00119915
RRM2B	0.847007	0.0227704		BAD	1.30288	0.00119915
CCDC47	0.874743	0.0227704		SLC7A6	1.4796	0.00122385
PLEKHH3	1.06365	0.0227704		DSCC1	-1.57677	0.00122385
ZBTB10	-0.623754	0.0229171		FOLR1	4.25446	0.00124118
CEP85L	1.62723	0.0229934		NIPSNAP2	1.2103	0.00124552
NFAT5	0.885599	0.0230614		NGLY1	1.1777	0.00128114
PPP3CC	1.09668	0.0231277		ARFRP1	0.848227	0.00128378
FECH	1.06418	0.0231277		CLSTN3	1.11609	0.001285
MAP3K2	0.641382	0.0231277		XRCC4	-0.930203	0.00129352
ANAPC13	-1.05121	0.0232509		ZNF268	-1.29077	0.00131546
SSBP3	-1.16972	0.0240103		HMGA1	-1.44602	0.00132905
ACOX1	1.03897	0.0240133		TTK	-1.58479	0.00132905
SLC25A22	0.880594	0.0240826		NOL8	-0.876133	0.00133411
RAP1B	0.993966	0.0243015		CECR2	-1.56104	0.00133912
SDHB	0.843032	0.0243015		TTC4	-0.998867	0.00133912
RWDD3	-1.49492	0.0243015		PPP3CA	0.615589	0.00133912
COG8	0.717015	0.0243015		CSNK1A1	0.615796	0.00137877
CD320	0.858708	0.024666		GNPDA2	1.48346	0.00137877
IGSF8	1.4097	0.0247775		CDR2L	1.04106	0.00137877
RPL31	-0.647618	0.0247775		NGFR	-2.17643	0.00138302
VPS13C	0.50138	0.0247775		AIF1L	-1.62026	0.00138732
CNBP	-0.580454	0.0248224		ERCC6L	-1.40907	0.00138765
MON1B	0.739834	0.0248224		RCAN1	1.5054	0.00139816
EMC2	0.760287	0.0248224		QKI	-0.949201	0.00139816
GBF1	0.767625	0.0248224		FHL3	-1.35813	0.00140925
ARFIP2	0.580939	0.0248224		SP1	-1.05994	0.00140925
MACO1	1.15158	0.0248711		SLC44A2	-1.14457	0.00140925
NCOR2	-0.683199	0.0248711		VWA8	1.08803	0.00140925
RCC2	-0.835458	0.0248711		TGS1	-0.975084	0.00140925
C11orf98	-0.661307	0.0248711		CYB561	1.83148	0.00140925
GTF2F1	-0.453226	0.0248711		ANKFY1	1.05197	0.00140925
EFNA3	9.17911	0.0248711		CCSER1	0.679174	0.00141277
HMOX2	0.766076	0.0248711		HNRNPAB	-0.78994	0.00141277
TSPAN7	1.60367	0.0248711		PPP1R3E	1.81029	0.00142818
CLDND1	0.944277	0.0248711		AJM1	1.10442	0.00143216
LIN7A	0.795877	0.0248711		WDR37	1.21025	0.00143395
PDP1	0.773738	0.025111		APOC3	2.82159	0.00143395
TAF15	0.906562	0.0251687		NCAM2	1.88403	0.00143395
RPL36AL	-1.36241	0.0251835		GTF2E2	-0.800242	0.00143395
RPS10	-0.659726	0.0251835		KIF14	-1.60913	0.00145071
RPS26	-0.751034	0.0253083		CADM2	2.30271	0.00147284
SMCR8	0.521975	0.0253083		BCL7C	-0.718768	0.00147291
TBC1D10B	0.709571	0.0253526		ZNF770	-0.818351	0.00149006
LSM3	-0.66062	0.0256987		MDC1	-1.44673	0.00150002
PREB	0.743544	0.0256987		MOCS2	-1.34559	0.00150709
ZNF217	-0.571646	0.0260436		NOP53	-0.888345	0.00152611
UCK1	0.539625	0.0260436		CSRP2	-1.35342	0.00152611
CSTF2T	-0.49829	0.0261258		NSMCE2	-0.875011	0.00152772
CORO7	1.07278	0.0261258		RPL5	-0.729268	0.00153303
MAST1	1.90643	0.0262213		RSPH1	1.68355	0.00153934
DCTN5	0.55849	0.0262213		RPIA	-0.939069	0.00153934
TMEM127	0.779249	0.0262213		RIN1	-2.08003	0.0015459
ZDHHC7	1.17892	0.0262213		JTB	1.22366	0.0015459
SLC30A6	0.863701	0.0262213		UBR3	1.02068	0.0015459
ZZEF1	0.561159	0.0262213		NCDN	0.637764	0.00155177
EPHA3	1.82227	0.0263224		TK1	-1.26817	0.00155683
TMEM41A	1.16883	0.0264523		SNRPA	-0.583098	0.00160933
STUB1	0.565487	0.0264523		CLN5	1.37919	0.00161813
PRXL2A	0.802324	0.0264523		CBFB	-1.19259	0.00162414
SMARCC1	-0.901238	0.0264523		IDH3G	1.68739	0.00162414
ZFAND1	-0.555262	0.026465		NCOR2	-0.903068	0.00162711
RBM19	0.582304	0.0266364		UBE3C	0.799579	0.00162711
RBIS	-0.943507	0.026936		PRKAA2	1.17503	0.00162711
RAB5B	0.655332	0.0269617		SLC18B1	1.4081	0.00162711
TMEM63B	1.08216	0.0270658		ATP2B2	1.2527	0.0016423
PRSS1	-3.11392	0.0272232		TSPAN7	2.11817	0.0016448
ILVBL	0.964019	0.0272303		GDE1	0.770342	0.00166503
STXBP3	0.829105	0.0273943		NTM	1.42029	0.00166528
FIBIN	-1.05273	0.0273943		BRMS1	-1.58605	0.00166528
RPL15	-0.65248	0.0273943		CEND1	2.53392	0.00168947
GORASP2	0.727055	0.0273943		UBE2S	-1.44375	0.00168947
APOOL	1.31187	0.0273943		CAMK2A	2.09601	0.001696
MUSTN1	-1.29847	0.0273943		RPA3	-0.904064	0.00171055
HDHD5	0.638448	0.0273943		SLC9A6	1.26037	0.0017152
WWTR1	1.65039	0.0273943		CRYL1	1.55626	0.00177278
PIAS3	1.19931	0.0273943		GALNT17	2.01055	0.00177278
NOC3L	0.585244	0.0273943		MEAF6	-0.907255	0.00177278
SSB	-0.591614	0.0273943		GNS	1.58746	0.00181091
DKK3	1.85213	0.0273943		SIX5	-1.1177	0.00181091
MTFP1	0.93043	0.0274054		PHYH	-1.64953	0.0018245
COX7A2	-1.00719	0.0274054		RIF1	-1.29004	0.00182665
SLC44A2	-0.817371	0.0274054		MTREX	-0.743592	0.00184064
RGPD5	1.65024	0.0274054		PALMD	3.19502	0.00185106
LETM1	0.849142	0.0276201		CSNK1D	1.62634	0.00185774
JUN	1.17021	0.0277179		NTNG2	1.69221	0.00186388
FARS2	0.718327	0.0277231		SYS1	1.28114	0.00187537
MBTPS2	1.11177	0.0280799		FBXO30	-0.815765	0.0018996
APOL2	0.818126	0.0280799		ZFYVE27	0.711995	0.0018996
MTR	-0.619901	0.0284846		SLC25A36	1.01612	0.0018996
CHD1L	-0.644892	0.0285385		CRAT	1.58821	0.0018996
JMJD7	0.721218	0.0286883		LLPH	-0.853079	0.0018996
ABRAXAS2	0.451181	0.0288135		CHTF18	-1.80316	0.0018996
UBN2	-0.722858	0.0288659		ABCC10	1.2659	0.00190601
YDJC	0.646787	0.0290238		NOLC1	-0.953388	0.00193219
NUP37	-0.615746	0.0290238		APCDD1	1.15363	0.00193815
RPL8	-0.57378	0.0290238		AP3M2	0.920673	0.00196077
MARK2	0.577358	0.0290238		TIMM8B	1.57466	0.00197199
CD59	1.40402	0.0290238		RHBDD3	1.10274	0.00197199
RAB6A	0.634339	0.0293146		FKBP5	-1.13526	0.00197775
COQ8A	-0.936398	0.0293146		FECH	1.33875	0.00197775
TFRC	1.37624	0.0293146		AMMECR1	-1.27034	0.00200831
ABL1	0.623094	0.0293146		MAGI2	1.06551	0.00201888
TMEM109	-0.723461	0.0293146		HPGD	4.18341	0.00202043
EHD1	0.645877	0.0293146		TBC1D5	-0.74383	0.00202049
GFER	0.621775	0.0293146		ZNF273	-1.22779	0.00202049
DEPDC1B	1.32707	0.0295674		ABHD10	0.843385	0.00202049
NUDT18	0.869054	0.0295674		ETFRF1	1.61241	0.00203633
EPHB3	0.947016	0.0296521		ODAD4	1.12495	0.00204263
TANC2	0.633699	0.0299042		SEPTIN5	2.07598	0.00204263
DLGAP5	-1.33997	0.0299498		PFKM	0.751226	0.00204707
MYCBP	-0.784721	0.0299785		FKBP1B	1.20994	0.00207215
PYGB	0.536684	0.0302038		LIMK2	-0.872628	0.00208884
FBXO44	0.793447	0.03044		EYA3	-0.751599	0.00209506
ATF7IP	-0.56391	0.03044		DTNA	1.1696	0.00210365
STARD3NL	0.863931	0.03044		KHSRP	-0.589322	0.00213768
AKTIP	0.500359	0.03044		CS	0.65242	0.00215255
ULK1	-1.03426	0.03044		GALT	1.17509	0.00216718
SLX9	-0.677726	0.03044		TCOF1	-0.776175	0.00218156
STN1	0.685143	0.03044		MARVELD2	1.09881	0.00218156
CYP1A1	2.65478	0.03044		CHN2	1.97232	0.00218156
OPA3	0.697316	0.0304717		CISD1	1.21111	0.00218156
MAN2A2	0.68664	0.0307503		TUBB4A	0.752468	0.00218156
CSNK2A2	-0.472749	0.0308583		SAMHD1	1.83154	0.00218156
BRMS1	-1.13232	0.0309238		FARP2	0.793303	0.00218156
SNRPD1	-0.488997	0.0309238		CKS1B	-1.6989	0.00218156
SEC16A	0.770685	0.0310447		CCDC88C	0.793542	0.00218609
TMED5	1.03845	0.0310447		POLR1G	-0.812828	0.0022164
CDK13	-0.53296	0.0310447		HSPA12A	1.30194	0.0022164
GIPC1	0.562511	0.0310447		ATP6V1B1	-3.06721	0.0022474
DUS2	0.562116	0.0312014		CYB5R1	1.99787	0.0022746
EIF1B	-0.591225	0.0313635		SLC25A11	1.11061	0.0022746
SRP19	0.551101	0.0314937		SEZ6L2	1.32215	0.00227649
STON1	-1.13381	0.0315		CSTF1	-0.578814	0.00227649
SVIP	1.46135	0.0315365		NDUFAF3	0.819558	0.00229048
SPAG7	-0.783692	0.0315452		CNTLN	-0.794736	0.00229553
ANXA5;cRAP-ANXA5	1.36376	0.0315452		LUZP1	-0.832553	0.00230607
DCAF15	-0.707783	0.0315452		REST	-0.922311	0.00233912
EIF2B3	0.504146	0.0315452		TOP2A	-1.91983	0.00233912
ZFAND6	-0.65652	0.0316626		CKS2	-2.10288	0.00233912
PFDN6	-0.659547	0.0319918		SLC25A13	1.06622	0.00234296
FAM110B	1.05574	0.0319918		STON1	-1.51089	0.00234296
ZBTB8OS	-1.12106	0.0319918		PLK1	-1.78703	0.00234296
EFCAB14	0.689585	0.0319918		DIAPH1	-0.891181	0.00234304
ATP6V1B2	0.429686	0.0319918		TOE1	-0.93077	0.00236621
ZBTB43	0.938241	0.0321383		KNOP1	-0.801623	0.00236648
FAF2	0.704837	0.0321383		GBA2	0.775323	0.00236648
ADCK1	1.05308	0.0321383		MCL1	-1.09678	0.00238133
SLC25A4	1.0844	0.0321383		GNL3L	-0.632724	0.00239245
PRKCG	1.27577	0.0321392		FAT1	0.862497	0.00239393
AP3S1	-0.623284	0.0321392		ARMCX1	0.897414	0.00242421
WFIKKN1	-1.58075	0.0321812		ACOX1	1.26984	0.00243035
CCNA2	-0.991067	0.0321812		TUBB4B	0.786613	0.00243681
INCENP	-1.1335	0.0321812		UQCRFS1	0.927533	0.00243681
MNT	-0.756452	0.0321812		LIPA	1.74352	0.00243962
ANGEL1	1.34604	0.0321812		CFL2	0.895066	0.00245521
PARN	-0.512023	0.0321812		SPDL1	-1.09961	0.00247305
CUTA	-0.925108	0.0322293		MEF2A	-1.30924	0.00249561
MTHFR	0.830306	0.0325751		ATPAF2	1.35665	0.00250019
NSMCE3	-0.812929	0.0328767		COA1	1.1369	0.00251128
FKBP15	0.594933	0.0330959		APOO	0.999658	0.00252766
RBM3	-1.15586	0.0332287		POLR3B	-0.687396	0.00252895
CSNK1G3	0.56232	0.0332584		MOB3B	1.47454	0.00255619
NR2F2	1.36507	0.0333604		SYNGR3	2.08666	0.0025611
PANK4	0.522306	0.0334832		C1QBP	0.67015	0.00257501
NDUFAF3	0.601421	0.0334987		TMEM231	1.67729	0.0026333
S100A13	-1.21577	0.033736		NPM3	-0.91912	0.0027028
VPS28	0.42075	0.033736		BEND3	-1.1571	0.0027426
NLGN1	0.917442	0.0340322		LETMD1	0.965721	0.0027544
DNAJA3	0.748124	0.0340322		CDK1	-1.57593	0.0027544
GLCE	0.811287	0.0340788		PSMG2	-0.627037	0.0027544
PCYOX1L	0.732236	0.0341587		BRD8	-0.796904	0.00276014
TBC1D31	0.686818	0.0341587		MIS12	-0.803083	0.00278027
RELL1	1.05471	0.0341587		CDK17	-0.89788	0.00278217
DGCR6L	0.825405	0.0341587		ARID2	-0.862345	0.00278217
PPP2R1B	-1.16786	0.0341587		ZNF625	-1.9124	0.00278435
RPL6	-0.819175	0.034168		cRAP-AHSG	3.04542	0.00278435
NRDC	-0.698027	0.0342725		PEX11B	0.928663	0.00278435
ACVR1	-1.13157	0.0342725		GOT2	0.712998	0.00278435
SLC25A23	0.95007	0.0347252		STUM	1.13373	0.00278775
ATP2B4	1.08202	0.0347466		S100A13	-1.60676	0.00278775
DALRD3	0.568158	0.034929		ATP6V1B2	0.55976	0.00279864
LMBRD2	0.607548	0.0354573		EXOSC3	-0.815829	0.00284103
ACTR1B	0.607057	0.0354573		ECHDC3	2.00622	0.00284103
CDK1	-1.17335	0.0354573		PRCP	1.43145	0.00284103
CSNK1A1	0.408853	0.0354573		TCEAL3	1.18675	0.00284537
GLA	-0.796641	0.0354573		PTGIS	-1.11227	0.00287719
PRDX1;cRAP-PRDX1	1.23428	0.0354573		ULK1	-1.32051	0.0028974
KCTD15	-0.594352	0.0354573		GTF2E1	-0.909472	0.0028974
GPT2	0.85446	0.035584		SLC8A1	1.90303	0.00291298
FASTKD5	0.484526	0.0359333		SHTN1	1.49585	0.00291298
GSN;cRAP-GSN	1.74758	0.0359441		TGIF1	-1.16897	0.00291298
NXT1	0.906334	0.0360528		ZNF451	-0.77818	0.00291955
HEXIM1	-0.739935	0.0360528		HPCAL4	2.07676	0.00291963
ALDH16A1	-0.538538	0.0360528		GINS2	-2.25502	0.00292283
CLCN4	1.02007	0.0360528		ROR1	-1.18713	0.00292283
ARL6	0.609587	0.0360546		KHDC4	-0.700249	0.00292283
CAMK2B	1.59992	0.0360546		UCKL1	0.660058	0.00292933
SDHAF2	0.77051	0.0360546		RNASEH2A	-1.71537	0.00293412
FAM162A	0.946583	0.0360546		MCAT	1.22036	0.00295541
SPOCK2	2.09512	0.0360546		LYRM2	0.647385	0.00295541
UBE2D4	-0.64015	0.0360546		LIN7A	0.955797	0.00295541
CYRIB	-0.662174	0.0360546		SLC25A42	1.26445	0.00297201
TMEM9	1.00588	0.0360546		INS	1.88681	0.00297201
TMED3	1.38234	0.0360546		ADCY9	1.01648	0.00298729
PNPLA8	0.850141	0.0363422		KIF3B	0.861286	0.00298729
B3GAT3	0.843575	0.0366114		TMEM200A	1.05311	0.00299794
CCDC91	-0.775334	0.0366878		ZBTB39	-0.972187	0.00300366
NAA20	-1.09191	0.0367032		ALG1	1.00504	0.00300892
CRYL1	1.06743	0.0367032		WDR20	0.655663	0.00302831
TUBB4A	0.53419	0.0367032		LYAR	-0.949576	0.00304425
ADSS2	-0.767056	0.0369885		AHCYL1	0.760625	0.00304425
SMAP2	0.85986	0.0369885		MDM1	0.963677	0.00304793
HSPE1	-0.772265	0.03703		CRIP1	-1.97202	0.00305649
KHSRP	-0.415618	0.0370357		CPEB2	0.678263	0.00305658
COMTD1	0.879143	0.0371185		NFIA	2.42481	0.00307568
ILF2	-0.55171	0.0374642		PRXL2B	1.02804	0.00307679
TYW1	0.830629	0.0374642		NF2	0.863074	0.00307679
LDB2	-1.76565	0.0376125		DNAJC17	-0.761316	0.00307679
RMI2	-1.25121	0.0378402		PIGG	1.44537	0.00307679
BAG4	-0.854978	0.0379476		MAGED2	-0.622056	0.00307679
WDR77	-0.569132	0.0379476		OARD1	-0.726987	0.00309919
GPAT4	0.8924	0.0379476		LBH	1.06888	0.00309919
MAD2L1	-1.0659	0.0379476		ATP5F1C	0.90383	0.00310883
TTC33	-0.822575	0.0379476		ALDH5A1	1.17238	0.00311139
HIKESHI	-0.675434	0.0379476		NPTN	1.18225	0.00311139
R3HDM2	-0.830771	0.0379476		OGDH	0.892672	0.0031343
VGLL4	-0.689984	0.0379476		ERMP1	1.49012	0.0031494
BRI3BP	1.36067	0.0379476		SMAP2	1.13824	0.00315224
NAXD	0.611803	0.0379476		ARHGEF12	0.842448	0.0032363
XRCC4	-0.598341	0.0381017		GABPA	-0.791525	0.0032363
ATP5MJ	1.04727	0.0381317		SERAC1	1.25637	0.0032363
GART	-0.595081	0.0381317		PDZD8	1.09845	0.0032363
TLK1	-0.635707	0.038259		CPSF3	-0.698126	0.0032363
MAGOHB	-0.717774	0.0383485		STARD3NL	1.07619	0.00328631
PKLR	-1.78388	0.0383485		SPG7	0.834662	0.00328631
KDM3B	-0.70369	0.0383485		RPA2	-0.850475	0.00328631
FOCAD	-0.548603	0.0383485		NFS1	0.792309	0.00328631
SEC24C	0.576863	0.0383485		FKBP4	-0.941443	0.00331088
SUMO2	-0.630029	0.0383485		RABL6	-0.636702	0.00331986
LRRTM4	1.41827	0.0383485		POLD3	-1.50417	0.00332387
PPP1CA	0.384432	0.0383485		CYP1B1	3.01919	0.00332387
HEATR5B	0.487783	0.0383485		WAC	-0.664555	0.00332776
POMGNT2	0.743032	0.0383485		PPIL4	-0.710961	0.00332776
RPS12	-0.547895	0.0385724		NAGLU	1.79883	0.00332776
GIGYF1	-0.642401	0.0385724		TANC2	0.782884	0.00332776
SDF2	0.81512	0.0385724		DDX42	-0.63149	0.00336501
ABRAXAS1	0.658114	0.0385724		ANLN	-1.13883	0.00339194
NDUFS8	0.888572	0.0387518		GPS2	-1.06183	0.00340311
CDIPT	0.985433	0.0388045		MTARC2	1.51251	0.00342424
GPD1L	1.12128	0.0388045		SDHA	0.870087	0.00342685
SH2D5	1.10144	0.0388045		KLHL7	-0.876689	0.00343808
YIPF6	0.716277	0.0388527		BTF3L4	-0.962066	0.00343808
PLCD3	1.07776	0.0388589		MASTL	-1.49876	0.00348093
RDH14	0.737148	0.0388605		ITIH4	3.31209	0.00351051
RSPO3	2.04814	0.0388605		GON4L	-0.734145	0.00352696
CHRDL1	1.93747	0.0388605		BDH2	0.813599	0.00353203
RPS28	-0.540671	0.0391705		FIP1L1	-0.483667	0.00353382
DHRS7	0.869173	0.0392634		YOD1	0.921533	0.0035396
cRAP-CYCS	1.86117	0.0394824		MCM3	-1.68965	0.00354531
WDFY1	0.686743	0.0397408		MTFP1	1.11468	0.00354772
GABPA	-0.586424	0.0397408		COMTD1	1.14229	0.00355111
SALL4	-1.22365	0.0398986		ESCO1	-0.681791	0.00355111
ZNF593	-0.544632	0.0398986		NBN	-0.723997	0.00355111
SFXN3	1.68872	0.0401156		ALS2	0.628329	0.00355788
ATP6V0A1	0.76812	0.0401156		GTF2F1	-0.525366	0.00355788
TMEM258	1.51934	0.0402256		GYS1	0.961482	0.00356738
LYRM4	0.692793	0.0405238		VLDLR	1.17731	0.00356738
HSPA12A	0.90014	0.0406529		MBOAT7	1.00243	0.00356738
AP5B1	0.728863	0.0406529		SDHB	0.966072	0.00356738
PPP6R1	0.448009	0.0406529		VAT1L	1.99106	0.00356738
TECPR1	0.787326	0.0409037		DYNC1I1	1.29212	0.00357564
BLOC1S6	1.22414	0.0410051		TOPBP1	-0.938872	0.00358018
CAMSAP2	0.880163	0.0410326		SMC5	-1.08492	0.00358111
CEP43	-0.791407	0.041341		TRIM71	-2.20927	0.00359089
C17orf58	0.982316	0.041341		FBXO44	0.970761	0.00359089
AAK1	0.524073	0.0413414		TMEM63B	1.2803	0.00359385
KBTBD2	-0.532243	0.0415007		NACA	-0.622894	0.00360061
FAM219B	0.850159	0.0415007		UBN2	-0.870214	0.00360061
XRCC1	-0.613991	0.0415007		TDRD7	1.4988	0.00360061
COG5	0.597622	0.0415007		MANBA	1.65108	0.00360061
RCAN1	0.956531	0.0415007		PPP3CB	1.00767	0.00360061
DDHD1	0.730276	0.0415007		CCNB1	-2.05778	0.00360061
MECP2	1.01431	0.0415007		KIF2C	-1.5416	0.00360061
GOLGA2	0.767365	0.0415007		RUNDC1	1.02857	0.00360061
ANKRD27	0.809663	0.0415007		GEMIN8	-0.844847	0.00361195
EIF4H	-0.619483	0.0420335		RAP2A	1.06595	0.00361195
SLC11A2	1.93215	0.0420597		POLR3D	-0.661772	0.00361195
FKBP4	-0.689999	0.0420597		EXOSC10	-0.718525	0.00361195
KGD4	1.17809	0.0420597		TRIM24	-0.981102	0.00363719
YOD1	0.682744	0.0421064		LIN28A	-2.32776	0.00363719
GABARAP	-1.63124	0.0421064		SIRT2	0.969575	0.00364556
SF1	-0.425106	0.0423903		ATP5PB	0.844425	0.00364705
PMS2CL	1.46129	0.0423903		ALDH2	0.966462	0.00365036
CDH13	0.917929	0.0423903		PDPK1	0.723468	0.00366714
PFAS	-0.625616	0.0423903		LRIF1	-0.699044	0.00367387
GPATCH4	0.670491	0.0423903		NARS2	0.845971	0.00368988
CERS4	1.30947	0.0423903		MAST4	1.01723	0.00369662
CLDN12	0.911805	0.0423903		MAD2L1	-1.37573	0.00369662
PSMG1	-0.636891	0.0423903		PPP1R9A	0.753991	0.00369662
RNFT2	0.569299	0.0423903		SFXN1	0.881659	0.00369662
SUCO	0.672001	0.0423903		PDCD4	-1.31039	0.00369991
API5	-0.44499	0.0423903		ZNF281	-1.04955	0.00369991
RPL18	-0.530265	0.0424205		OGFOD2	0.877974	0.00370065
MRPL51	1.07452	0.0424205		DPP7	2.07291	0.00373026
NACA	-0.46191	0.0424205		UNC119	1.35947	0.00373026
TSN	-0.469641	0.0424205		MCM5	-1.66882	0.00373026
TMED2	1.04903	0.0424864		SEMA4G	1.69864	0.00374624
PLCD4	-0.937618	0.0424864		NFYB	-0.97542	0.00374624
SCFD2	0.612422	0.0424864		RMI2	-1.60697	0.00374769
RMC1	0.708748	0.0424864		KDM3B	-0.909282	0.00376423
STX4	0.87652	0.0425207		PPP2R2A	0.682394	0.00376619
RTF2	-0.913083	0.0425207		MAN2B2	1.52594	0.00376619
TIMM10	0.692142	0.0425207		GRTP1	1.16487	0.00376619
RPL30	-0.600277	0.0427244		RIPOR1	-0.818267	0.00377696
ZCCHC17	0.74166	0.0427244		SPC24	-2.17115	0.00381174
NOLC1	-0.63195	0.0427244		RAB36	1.69285	0.00382251
SENP5	0.987046	0.0428286		INCENP	-1.39316	0.00382351
HARS1;cRAP-HARS	1.33968	0.0429844		ZCCHC9	-0.72075	0.00382495
CCM2	0.615655	0.0430242		IAH1	0.988074	0.0038379
EGLN1	0.840261	0.0430876		CRLF3	-0.81588	0.00383794
CASKIN1	0.618721	0.0441683		DIMT1	-0.799286	0.0038564
USP13	-1.07637	0.0441683		CHMP1B	-0.720935	0.0038564
ARL10	1.23804	0.0445185		FBXO46	-1.04689	0.00388066
NAA10	0.41306	0.0445946		NUP43	-0.652799	0.00388518
CRYAB	2.66736	0.0445946		ACYP2	1.45239	0.00389033
PCIF1	0.509056	0.0445946		GPR155	1.3303	0.00390087
RPL7	-0.485259	0.0445946		EXOC6	0.691024	0.00390106
ZWILCH	-1.15587	0.0445946		TRIP13	-1.35501	0.00391296
OTX1	1.05563	0.044853		LIG1	-1.12676	0.00391296
PDE12	0.401479	0.0449736		HDAC5	-1.09151	0.00391296
ATP13A2	0.855085	0.04526		NSMCE3	-0.998229	0.0039136
SEC11A	0.612615	0.04526		STAG2	-0.650513	0.00394918
SLC25A29	1.01797	0.0454871		LGALSL	0.803839	0.00394918
CD58	0.918792	0.0454871		CHD1	-0.924062	0.00396014
ATE1	0.473538	0.0454871		PTEN	0.643495	0.00396097
BCAR1	-0.614819	0.0454871		ARL14EP	-0.646007	0.00396097
SRSF6	-0.485315	0.0456141		COG8	0.802452	0.00396097
YWHAB	-0.647533	0.0456732		EXOSC6	-0.738096	0.00396301
DUT	-0.72977	0.0457309		AKR7A2	0.808951	0.00396301
RILPL1	-0.499883	0.0459185		DNAJB4	-1.32458	0.00396301
YRDC	0.627966	0.0459185		PPP4R3B	-0.980041	0.00396301
DHX32	0.660101	0.0460742		CES2	1.14941	0.00396301
SELENOS	0.529773	0.0460742		NLGN1	1.13017	0.00398624
DDX19B	0.619646	0.0460742		EEF2K	1.50103	0.00400386
PDPK1	0.528254	0.0460742		THEM6	0.727457	0.00400386
FBXW9	0.9295	0.0460742		NRBF2	-0.773775	0.00400571
DDIT4	0.732467	0.0460742		AP2A1	0.517699	0.00400571
RPA1	-0.592279	0.0460742		SLC25A6	0.865469	0.0040098
HK1	0.562395	0.0460742		LETM1	0.988525	0.0040098
RRAS2	0.583882	0.0460742		NOL3	1.47441	0.00402471
NRN1	1.27788	0.0460742		MAOB	3.69914	0.00402471
TRAPPC2L	-0.483263	0.0461217		ATP5F1D	0.863632	0.00402898
ANP32E	-0.640968	0.046338		SLC25A23	1.17325	0.00403872
PAX7	-1.26943	0.0467578		SMPDL3B	2.30209	0.00403872
RPS25	-0.453658	0.0470167		MSH2	-0.847402	0.00406433
FXR2	0.628648	0.047076		RPL8	-0.673425	0.00406433
TMEM263	1.47314	0.0473693		ATP5F1A	0.705534	0.00408066
CDC23	-0.504804	0.0478451		PIK3R1	0.860836	0.00408066
IGSF21	1.52321	0.0478451		LYSMD3	1.60971	0.00408388
FBXO28	-0.652583	0.0478451		MAGED1	0.843234	0.00408388
SYNGR1	0.968354	0.0479947		POLR3C	-0.588446	0.00408388
SOD2	-1.33054	0.0479947		PISD	0.755601	0.00409331
CAMK2D	1.1199	0.048043		ZPR1	-0.561142	0.00409331
FOXK1	-0.714086	0.048043		AIFM1	0.909397	0.00409331
GSTM3	0.671619	0.048043		RBPMS2	-2.1208	0.00409331
TUBAL3	1.05388	0.048043		JCHAIN	2.34933	0.00409766
CC2D1A	0.63268	0.048043		MPC1	2.15722	0.0041083
KEAP1	-0.854021	0.048043		IQSEC2	0.89931	0.00413155
SLC25A19	1.28895	0.048043		TIMM29	0.897937	0.00413649
TANK	0.688048	0.048043		RHOT2	0.891139	0.00416315
CAB39L	0.964016	0.048043		ATP5PO	0.843081	0.00417139
ABCF1	0.393737	0.048043		C11orf98	-0.738114	0.00417166
	-1.40944	0.0481124		PPP1R10	-0.653975	0.00417434
PRRC2B	0.623	0.0482492		TTC27	-0.551201	0.00417434
KIFAP3	0.650954	0.0482492		CLMN	1.42707	0.00417939
BACC1	-0.44443	0.0482859		ARL6	0.753696	0.00421694
RPL10A	-0.464611	0.0482859		GALNT5	1.81697	0.00422659
GDAP2	0.572196	0.0482859		URI1	-0.671593	0.00424337
UVRAG	0.540344	0.0484415		NUSAP1	-1.31972	0.00424374
AGPAT3	0.957719	0.0486761		DECR1	1.16995	0.00425367
WDR37	0.739638	0.0486761		EXOSC9	-0.739345	0.00426682
PDIA6	-0.567982	0.0486761		MAPRE3	1.67262	0.00426682
PPP1R3E	1.10486	0.0486761		LMBRD2	0.744171	0.00428852
GSTP1;cRAP-GSTP1	1.02233	0.0488452		BTF3	-0.937177	0.00430264
ARFGEF3	0.870458	0.0488452		MPV17	0.782491	0.00430264
HRAS;cRAP-HRAS	2.24695	0.0489112		RBBP7	-0.684028	0.00430264
PRPF39	-0.532714	0.0489112		OSBP2	0.793614	0.00430264
PIGO	0.570772	0.0490106		TRIL	1.77647	0.00430264
ASF1A	-0.608684	0.0490106		METAP1	-0.574743	0.00430264
FARP2	0.517438	0.0490106		PCCA	0.705232	0.00430522
TSPYL2	1.52441	0.0490106		STAT1	-0.67647	0.00430522
KIF3A	0.697768	0.0490106		CEBPZ	-0.803482	0.00433227
KRAS	0.744667	0.0490106		COASY	0.884464	0.00434129
TOR1AIP2	-0.793023	0.0490106		RETSAT	1.20099	0.00435225
EMC10	0.885426	0.0490106		TMEM104	1.27675	0.00437849
SLC35C2	0.989776	0.0490106		SLC25A25	1.27085	0.00444058
RBPMS2	-1.55498	0.0490106		G3BP1	-0.783692	0.00444518
ROMO1	1.26217	0.0490106		SIAE	1.84822	0.00444768
ADCY9	0.697473	0.0490106		RNF41	0.987739	0.0044556
MTDH	0.84404	0.0490106		IGLC2;IGLC3	1.25735	0.0044556
NIPSNAP3A	-0.780218	0.0490106		VPS9D1	1.20878	0.0044556
MTSS2	0.395024	0.0490106		RPL22L1	-2.74908	0.0044556
RPL11	-0.514454	0.0493481		DDX56	-0.695678	0.0044556
SKI	1.13252	0.0493481		IFT70B	2.29347	0.0044647
				TMEM115	1.19951	0.0044647
				RPA1	-0.778633	0.0044647
				IDUA	1.77723	0.00449164
				TNRC6B	-0.825035	0.00449334
				HSDL2	1.11072	0.00449366
				KCTD15	-0.721766	0.00451607
				R3HCC1L	-0.606166	0.00451638
				BRD4	-0.681746	0.00453993
				MROH1	1.62399	0.00454176
				LRP8	1.69948	0.00456874
				LMO4	-0.874693	0.00457404
				PSMG1	-0.814655	0.00457404
				TMA16	-0.927551	0.00457897
				PLEKHA6	1.50134	0.00457897
				SLC25A51	0.984748	0.0045857
				TMX2	0.987486	0.00463637
				SNX17	0.872982	0.00463637
				XPNPEP3	0.719365	0.00465131
				EPHB3	1.08889	0.00468005
				OCIAD1	1.0074	0.00468661
				GLB1L2	2.01523	0.00472615
				CDC20B	-1.9084	0.00473282
				HAT1	-1.16336	0.00473922
				RFC4	-0.968698	0.00473922
				RPL36A	-0.652012	0.00477997
				ASPSCR1	-0.598292	0.00477997
				CNEP1R1	0.81448	0.00477997
				PANK4	0.61857	0.00479987
				MFF	0.923677	0.00480903
				LAMP2	0.999965	0.00480903
				MAST2	0.578807	0.00480903
				RPL39;RPL39P5	-0.740922	0.00480903
				ARSD	1.08118	0.00482274
				ZBTB2	-0.787005	0.00482543
				KIFAP3	0.85409	0.0048269
				MCM6	-1.70886	0.0048269
				PPWD1	-0.563832	0.00482918
				EXOSC2	-0.66197	0.00483004
				PLEKHG5	0.999874	0.00484203
				ORC2	-0.917041	0.00484203
				METTL17	1.44218	0.00484203
				CMTM4	1.44814	0.0048486
				C12orf57	-0.728069	0.00485072
				TK2	1.35931	0.00485126
				SPARCL1	1.98858	0.00485126
				EXOSC7	-0.631378	0.00487544
				CENPF	-1.45911	0.00488898
				KIAA0232	0.584309	0.00488898
				DNAJC9	-1.01112	0.00488898
				HTRA2	0.884034	0.00488898
				COX17	1.08938	0.00488898
				SLC25A22	0.940749	0.00488898
				PLEKHO2	-0.70729	0.00488898
				COX15	1.11824	0.00488898
				ARSK	0.955958	0.00489269
				SMCO3	-2.77029	0.00496029
				TFAP4	-1.45699	0.00497997
				ABHD6	1.21599	0.0050197
				RFC2	-0.963651	0.0050197
				CHRAC1	-1.0851	0.00504008
				GPKOW	-0.704344	0.00506213
				DPCD	0.894077	0.00506723
				NMNAT3	0.776223	0.00511073
				DNAJC5	0.991853	0.0051467
				ORC4	-0.846557	0.00517324
				CWC27	-0.673735	0.00517324
				SLC19A1	1.66266	0.0051862
				PRIM1	-1.6378	0.0051862
				IPO5	-0.677338	0.0051862
				PAXX	0.771166	0.0051862
				MED30	-0.683354	0.00519111
				CPT2	0.891693	0.0052056
				CENPK	-1.52586	0.0052056
				PUDP	0.738029	0.00521457
				BAZ2A	-0.961314	0.00523168
				LARS2	0.688485	0.00523168
				DDX20	-0.603591	0.00523168
				IGSF21	1.95794	0.00523758
				CNN3	-0.731596	0.00524872
				SCRN1	0.699027	0.00526305
				RECQL	-0.676478	0.0052859
				NSMCE1	-0.928397	0.0052859
				FOXP4	-0.922341	0.0052859
				LRRC45	1.04482	0.0052859
				ZNF516	-0.878502	0.0052859
				MSH6	-0.807156	0.0052859
				UBE2H	-1.19028	0.00530512
				HS2ST1	1.26898	0.0053216
				IGSF8	1.4928	0.00533612
				LINGO2	2.27872	0.00534198
				OSBPL6	1.05677	0.00534923
				KCTD16	1.33324	0.00535593
				CSNK1G2	0.619756	0.00538979
				NME5	1.11282	0.00538979
				RDH11	0.810135	0.00538979
				SYNM	1.40541	0.00538979
				TMEM106B	0.836896	0.00538979
				EARS2	0.819045	0.00538979
				GNL2	-0.720712	0.00538979
				MCM7	-1.61779	0.00538979
				INO80C	-0.917462	0.0054201
				MCM2	-1.67597	0.0054201
				RPRD1A	-0.720973	0.0054201
				PTK2	-0.511961	0.00543284
				SGSH	1.76239	0.00543284
				CKMT1A	1.30833	0.0054448
				DDX51	-0.760724	0.00548356
				ZNF738	-1.40211	0.00549863
				ARMH3	0.834896	0.00549863
				ISCA2	0.80248	0.00550498
				HSPA14	-0.645375	0.00557342
				PRRC2C	-0.48033	0.00557342
				RFC5	-0.979806	0.00557846
				RRP1B	-0.62648	0.00558333
				PMS1	-0.740064	0.00559346
				LRATD2	1.07395	0.00564179
				TLK2	-0.779384	0.00564179
				INPP5B	-0.567144	0.00564179
				ACSS1	1.34877	0.00564179
				CUTA	1.05265	0.00564179
				KPNA2	-1.57995	0.00564179
				PABIR2	-1.48258	0.00564179
				TENM2	2.00511	0.00564179
				CMSS1	-1.02177	0.00564179
				NSL1	-0.698813	0.00564179
				MDN1	-1.00214	0.00564179
				RIDA	1.07563	0.00571725
				NRBP2	0.919528	0.00573533
				CMPK1	0.799589	0.00574022
				NAT14	1.0034	0.00574022
				NNT	1.09929	0.00574022
				PUS3	-0.768804	0.00574022
				SLC25A53	1.16135	0.00574022
				MAP2K4	0.506236	0.00574022
				NCR3LG1	1.42028	0.00574022
				UTP14A	-0.570664	0.00575595
				TMEM70	1.61722	0.00575595
				MYORG	0.955924	0.00577067
				WDR4	-0.998628	0.00578238
				MIIP	-1.20981	0.00579418
				EPHA3	1.93991	0.00579418
				UQCR10	1.33341	0.00584829
				SPATA20	1.08997	0.00584829
				API5	-0.542542	0.00585356
				ARFGEF3	1.10338	0.00585387
				SIX4	-1.70926	0.0058654
				APOOL	1.41008	0.00588057
				MED13L	-0.761062	0.00588211
				ZNF326	-0.713406	0.00588211
				GOLM2	1.0399	0.00588211
				SCLY	0.610764	0.00588877
				SEC16A	0.85603	0.00589803
				GINS4	-1.87186	0.00589976
				SF3B2	-0.501942	0.00594541
				POLR3E	-0.520656	0.00595992
				KIF20B	-0.929332	0.00599967
				CLCN4	1.17643	0.00602923
				FMC1	1.04313	0.00604512
				VDAC1	0.769762	0.00604512
				MPI	0.82424	0.00604512
				MICOS13	0.818799	0.00604512
				IGLON5	2.05031	0.00605416
				PYGO2	-1.28193	0.00605591
				CNPY3	-0.712032	0.0060784
				POLR2E	-0.502952	0.00609042
				OGA	-0.689055	0.00609042
				SYMPK	-0.535616	0.00609042
				RPL35A	-0.568468	0.00609511
				CRIPT	-0.736424	0.00609511
				PKNOX1	-1.15927	0.00609511
				SMNDC1	-0.552141	0.00612128
				PCCB	0.597893	0.00613052
				MTCH2	0.858649	0.00616931
				GINS3	-1.80651	0.00616931
				DDX50	-0.646851	0.00618537
				PAN2	-0.725482	0.00619616
				FANCI	-1.65351	0.00619616
				TPP1	1.77122	0.00619619
				ABHD11	1.12493	0.00619619
				BBS5	1.07331	0.00620899
				SNRPA1	-0.479028	0.00622194
				SRFBP1	-0.653122	0.00623388
				PYROXD2	1.21974	0.00623804
				CDK5	0.860709	0.00626909
				CAMK2D	1.39054	0.00626909
				MARK1	1.03351	0.00626909
				TAPT1	1.03352	0.00626909
				TYRO3	-1.42258	0.00626909
				RPL10A	-0.578736	0.00626951
				SELENOW	1.42188	0.00626951
				RCC1	-0.654631	0.00626951
				LRSAM1	0.877925	0.00628028
				ZFAND6	-0.724739	0.00628028
				EXOSC8	-0.710813	0.00630129
				RAB30	1.39216	0.00630584
				FXYD1	2.06603	0.00631181
				PPP1R16A	1.3032	0.00631395
				PRKAB2	0.957257	0.00631395
				FRG1	-0.923157	0.00632356
				CWF19L1	-0.534344	0.0063593
				HMCES	-0.992675	0.00641764
				FN3K	0.708893	0.00644621
				SNRPF	-0.556609	0.00644621
				CHCHD4	0.874629	0.00644648
				NCAPH	-1.47777	0.00648807
				TNPO2	0.652857	0.00648807
				FUS	-0.519525	0.00653783
				SKIC2	0.500148	0.00655269
				SORL1	-0.978116	0.00655269
				KAT7	-0.801393	0.00655499
				LRRC4	1.98247	0.00658219
				PALM2AKAP2	-1.16574	0.00658219
				SLC35A1	1.28996	0.00658219
				HECTD4	1.05118	0.00658219
				TIPIN	-1.78286	0.00659357
				TBC1D7	0.630532	0.00659357
				COA6	1.13955	0.00659357
				SF3B4	-0.495539	0.00660717
				PCNA	-1.30942	0.00664352
				CBX2	-1.15211	0.00664352
				PGS1	0.707739	0.00664352
				GPD1L	1.29942	0.00665694
				PTPN11	0.611783	0.00666475
				RPS12	-0.633032	0.00667849
				MCM4	-1.63583	0.00667849
				UPRT	0.596026	0.00667849
				SNRPG;SNRPGP15	-0.536766	0.00667849
				CENPC	-0.854691	0.00667849
				SKA1	-1.43118	0.0066838
				CERS4	1.5518	0.00671985
				ITPKB	1.12969	0.00672495
				SETD2	-0.695183	0.00672495
				PNPLA8	0.961097	0.00676564
				HK2	1.25133	0.00676564
				AP1G1	0.465247	0.00676564
				WDR89	-0.852855	0.00676564
				TENM3	1.25854	0.00677998
				FGD4	0.803226	0.00683598
				CDCA7L	-1.26046	0.00683598
				NDC80	-1.42191	0.00684971
				IQSEC1	1.29711	0.00689973
				RAC1	0.516822	0.00689973
				NELL2	1.05955	0.00689973
				PFKP	1.44769	0.00689973
				UBAP2	-0.592498	0.00689973
				ME2	0.558374	0.00690386
				ARSB	1.02809	0.00690386
				POLD1	-1.21354	0.00696484
				GLA	-0.887653	0.00698912
				RRP15	-0.829539	0.00700756
				CPT1C	1.24792	0.00700756
				ASH2L	-0.601897	0.00702841
				ZWILCH	-1.37714	0.00703712
				ARID3A	-1.90195	0.00704482
				PTGFRN	1.14786	0.00710919
				GSTM3	0.814656	0.00710919
				NUP153	-0.541917	0.00710919
				ATP6V0D1	0.960811	0.00711213
				LMTK2	0.644611	0.00711213
				FHIT	0.817518	0.00711515
				FKBP15	0.649263	0.00711515
				DPF2	-0.7256	0.00711515
				ANAPC15	-1.01899	0.00711515
				ARID1A	-0.726573	0.00711515
				DPP10	1.0245	0.00715108
				CLIC4	-1.10325	0.00715655
				TOMM40L	0.891027	0.00715679
				GABRA3	1.9908	0.00717966
				NDUFS8	1.01321	0.00718447
				LIAS	0.979813	0.00718447
				MTA1	-0.727181	0.00718447
				FBXL20	-0.780221	0.00722459
				LSAMP	1.41854	0.0072294
				ATP13A2	1.01572	0.00722974
				BORCS6	0.637794	0.00725344
				CA5B	1.83755	0.00725344
				NAA50	-0.489775	0.00725344
				ENO2	1.28372	0.00726855
				RNASEH2B	-1.52044	0.00727838
				PMF1	-0.831704	0.00731687
				TRIM46	2.22155	0.00731687
				IDH2	0.519924	0.00731687
				LRWD1	-0.839413	0.00732693
				NSMCE4A	-0.953752	0.00733753
				NCAPD2	-1.88756	0.00733753
				POLR3F	-0.70941	0.00737289
				PKP4	0.81499	0.0074215
				IRF2BP1	-0.522947	0.0074215
				SENP1	-0.658117	0.00745807
				ACTL6A	-0.594901	0.00745807
				PLD3	0.828863	0.00747554
				SIRT1	-1.04781	0.00753383
				DUS2	0.595691	0.00763092
				RTF1	-0.551248	0.00763249
				VRK1	-1.11889	0.00763424
				SCAF11	-0.705092	0.00763424
				WAPL	-0.553661	0.00763424
				QRICH1	-0.62078	0.00763424
				FUCA1	1.62044	0.00763762
				GARRE1	-0.967946	0.00763762
				LYRM9	1.1075	0.00764474
				ALMS1	-0.705236	0.00764474
				MNT	-0.810029	0.00764474
				PLEKHA3	0.821441	0.00764474
				SFXN4	0.866178	0.00764474
				FAF1	-0.624336	0.00765846
				PUS7	-0.803247	0.00768592
				RAB5C	0.491225	0.00769451
				BCKDK	0.96959	0.00772321
				GOLGA1	0.990043	0.00773724
				RPL19	-0.504266	0.00777468
				SCPEP1	-1.07816	0.00783196
				CAD	-0.600222	0.00785717
				TIMM21	1.0662	0.00788804
				ILF3	-0.45181	0.00790533
				USP28	-1.19625	0.00790533
				UQCC6	1.1377	0.00793805
				AGK	0.864688	0.00793805
				NUAK2	-0.998527	0.00793931
				CACTIN	-0.718833	0.00794268
				POLR3A	-0.516158	0.00795144
				MIPEP	0.901829	0.00795453
				NECAP1	0.94443	0.00795453
				ISCA1	0.773772	0.00795453
				RNASEH2C	-1.2582	0.00795453
				C9orf78	-0.83404	0.00798107
				CCDC12	-0.592151	0.00802714
				NUB1	-0.615274	0.00802714
				COLEC12	2.59015	0.0080682
				SREK1	-0.534978	0.0080682
				WRN	-1.09427	0.0080682
				PLEKHA4	0.916494	0.00811358
				SLC1A3	2.98379	0.00812268
				PTGS1	1.52276	0.00814903
				SLC7A1	1.30458	0.00814903
				COQ8A	-0.961738	0.00818108
				POLR2A	-0.552026	0.00818285
				UQCRB	0.799338	0.00818939
				SMARCE1	-0.635441	0.00822391
				DKK3	1.86883	0.00822616
				GMPPB	0.797541	0.00825737
				UQCRC2	0.793118	0.00825737
				CACNA2D2	1.49683	0.00826333
				CHD1L	-0.655801	0.00828189
				NKIRAS1	0.709397	0.0082981
				UBAP2L	-0.454065	0.00832963
				KIF11	-1.59245	0.00836454
				SAAL1	-0.817071	0.00837038
				CBLN1	2.23569	0.00837038
				POLE	-1.27845	0.00837038
				CNN1	-1.70114	0.00837038
				VDAC2	0.754195	0.00841749
				POMT1	1.18232	0.00841749
				MTERF1	0.652156	0.00841749
				CCDC50	-1.06413	0.00841749
				URB2	-0.716603	0.00841749
				NUP50	-0.546928	0.00841749
				DDX46	-0.468614	0.00841749
				COX20	0.75987	0.00841749
				FTSJ3	-0.580124	0.00841749
				XRCC5	-0.487759	0.00841749
				RAD21	-0.587024	0.00842616
				EXOSC5	-0.662043	0.00846504
				LYRM4	0.774146	0.00846504
				POLA1	-1.59891	0.00846504
				NDUFA2	0.63557	0.00846504
				ALPL	-1.5091	0.0085246
				RPL28	-0.529702	0.0085361
				ATP2C1	0.708809	0.00855335
				RABIF	0.83572	0.00858241
				CIR1	-1.07524	0.00860989
				IVNS1ABP	-0.842425	0.00861619
				CDCA8	-1.52702	0.00861619
				WBP4	-0.7469	0.00861619
				WDR70	-0.623842	0.00862869
				FH	0.629359	0.00862869
				FBXL15	0.668894	0.00862869
				STUB1	0.557894	0.00864022
				NIT1	0.536748	0.00864022
				RPL34	-0.430587	0.00864945
				ARID3B	-1.29614	0.00865955
				PROM1	1.09467	0.00865955
				ADARB1	0.754098	0.00865955
				ITGA9	-1.11997	0.00865955
				OTUD4	-0.528492	0.0087308
				PDE12	0.459306	0.0087308
				MAGED4	0.986419	0.00874221
				RPS25	-0.525002	0.00875133
				ECEL1	2.04437	0.00879106
				OSBPL2	0.572352	0.00881957
				NDUFS1	0.73332	0.0088694
				CKAP2L	-1.05444	0.00887037
				RPL7	-0.552292	0.00890993
				FKRP	0.735199	0.00891721
				IWS1	-0.694718	0.00893621
				SLC25A3	0.679569	0.00893841
				ADNP2	-0.805506	0.00894193
				CDYL	-0.803168	0.00894193
				FAAH	0.969742	0.00895474
				ACSL1	1.86064	0.00895618
				UQCRC1	0.712077	0.00895618
				MCAM	0.923641	0.0089811
				ARSA	1.44735	0.0089811
				CLIC6	2.93559	0.0089811
				C19orf12	0.69029	0.00899153
				SAP30	-1.01348	0.00903297
				SLC25A5	0.705537	0.00903297
				RAB3GAP2	0.459545	0.00903297
				TOM1L2	0.655513	0.00904088
				COMMD9	0.449907	0.00904088
				GSE1	-0.839081	0.00904489
				DUSP23	0.842499	0.00908054
				PPOX	0.70003	0.00908634
				TMEM65	1.43846	0.00908634
				C3orf33	1.28268	0.00909582
				UCK1	0.523057	0.00910378
				DNAJA3	0.782812	0.00910378
				SLC25A44	1.03514	0.00910378
				GRAMD1B	1.16491	0.00914625
				SRPK1	-0.689681	0.00915036
				WNT2B	2.05393	0.00915068
				SEPTIN2	-0.44228	0.00916987
				TCEA1	-0.590842	0.00917033
				EIF3I	-0.41308	0.00917742
				LONP1	0.705792	0.00918124
				PLD2	-0.97552	0.00918124
				UBE2T	-1.43454	0.00918124
				CREM	-1.11149	0.0091864
				MPHOSPH10	-0.668887	0.0091864
				RAB9B	1.67522	0.0091864
				SLC5A6	2.56094	0.00922117
				MAST1	1.84677	0.00922117
				GMEB2	-0.694411	0.00922117
				SIRT3	0.840059	0.0092896
				SRSF11	-0.483297	0.00929876
				WFS1	0.653589	0.00929876
				MIS18A	-1.28563	0.00929876
				NR6A1	-1.97915	0.00929876
				ARL10	1.39238	0.00930741
				RPL21	-0.59106	0.00930741
				CAPN5	-0.857576	0.00930741
				PARP1	-0.800035	0.00930741
				TMEM175	1.02323	0.00930741
				SMC2	-1.45767	0.009318
				TIMELESS	-1.34889	0.00933193
				SLC4A5	1.33517	0.00933193
				HIBCH	1.018	0.00933193
				RBM7	-0.673921	0.00935453
				cRAP-ALB	2.91704	0.00939381
				ABCB7	0.477847	0.00942998
				GMPR2	0.893821	0.00942998
				PWWP2A	-0.757688	0.00951412
				SF3A1	-0.514016	0.00951412
				RAB15	0.624569	0.00951412
				ATP6V1C1	0.655805	0.00951412
				CPSF2	-0.595883	0.00951412
				PRAG1	-1.4114	0.00951501
				SNW1	-0.489465	0.00951501
				ACTR1B	0.634959	0.00951501
				RDH14	0.796062	0.00951501
				COMMD5	0.530655	0.00951501
				BBS7	0.657504	0.00954696
				HOMER1	0.643493	0.0095591
				IVD	0.965679	0.0095591
				KAZN	1.02064	0.00956603
				TBRG4	0.615553	0.00956817
				BANP	-0.704848	0.00956817
				SLC12A9	0.989039	0.00957269
				DDAH1	1.29846	0.00957269
				CAPS	2.51385	0.00963724
				AP5B1	0.792495	0.00965914
				SCRN3	1.01983	0.00971061
				RGL2	0.638779	0.00971061
				RBBP4	-0.855894	0.00971061
				PGM5	2.83846	0.00972142
				HRC	-1.7188	0.00973969
				SDE2	-0.671605	0.00974027
				GFOD1	1.0204	0.00974027
				RFC3	-0.745313	0.00975854
				BAG4	-0.906783	0.0097798
				POLL	-0.702177	0.00981056
				SCAF4	-0.728959	0.00983261
				DCXR	-0.685656	0.00983261
				WFIKKN1	-1.60558	0.00983261
				SSU72	-0.510285	0.00983261
				SLBP	-1.5642	0.00985202
				SNRPD2	-0.44018	0.00987722
				GGT7	0.676194	0.00987999
				ELAC2	-0.615755	0.00989838
				AK3	0.638241	0.0099025
				SFXN3	1.82068	0.00990747
				SMC4	-1.4394	0.00991754
				ARHGAP18	1.15595	0.00991754
				TSFM	0.737654	0.00997528
				EP300	-0.536069	0.00997698
				BRD7	-0.841848	0.00997698
				NFATC2	1.17497	0.00999418
				DUSP22	0.607657	0.00999418
				FASTKD5	0.503295	0.00999418
				FANCD2	-1.28568	0.00999439
				PRKAG1	0.747083	0.00999439
				WDR91	0.650473	0.00999611
				DUSP3	0.602175	0.00999611
				MCCC1	0.958965	0.0100359
				GDF7	1.7676	0.0100374
				HAUS4	-0.801139	0.0100374
				PLEKHH3	0.973227	0.0100374
				GZF1	-0.655361	0.0100374
				HIGD2A	0.936034	0.0100709
				ACAD11	1.56389	0.0100877
				FLCN	0.804637	0.0100951
				GATD1	0.568456	0.0101117
				NEDD1	-0.640568	0.0101169
				CHTOP	-0.533543	0.0101202
				PLBD2	0.94588	0.0101288
				GTF3C5	-0.637436	0.0101817
				CYC1	0.92537	0.0102042
				CERS1	1.44947	0.0102042
				TRIQK	0.638581	0.0102145
				SCYL3	1.02151	0.0102145
				ORC6	-1.26723	0.0102145
				TRIM28	-0.611913	0.0102172
				MGAT5	1.50871	0.0102172
				CEP83	1.26779	0.0102258
				VPS26C	0.457337	0.0102518
				PURA	0.947167	0.0102518
				ARL6IP5	0.774642	0.0102518
				PDF	0.722215	0.0102518
				GLDC	-0.967182	0.0102518
				PTRHD1	0.486708	0.0102518
				SMC6	-0.997255	0.0102518
				TOM1L1	1.33451	0.0102518
				SAP30BP	-0.556258	0.0102518
				KDM1A	-0.660485	0.0102518
				TRMT1L	-0.569168	0.0102549
				EP400P1	-1.23625	0.0102588
				RPS27	-0.620672	0.0102625
				MAIP1	0.89071	0.0102761
				CHCHD3	0.73316	0.0102784
				CBR4	1.06826	0.0102957
				CFI	1.55976	0.0103214
				SORCS3	1.28476	0.0103214
				OCRL	0.675031	0.0103278
				SMARCA1	-0.65558	0.0103862
				DUS3L	-0.543967	0.0104047
				ATP5MF	0.81203	0.0104178
				UBR5	-0.560339	0.0104369
				FAM168B	-0.873484	0.0104568
				RBPMS	-2.55912	0.0104568
				ZMYM3	-0.762238	0.0104597
				HEATR6	-0.588642	0.010467
				MUSTN1	-1.23986	0.010467
				ELF2	-0.938552	0.0104745
				RDH13	1.21559	0.0105423
				NCAPG	-1.52906	0.0105779
				PCF11	-0.610113	0.0105942
				EDF1	-0.614647	0.0105942
				PFAS	-0.674644	0.0105942
				CCDC93	0.450124	0.0105942
				ZNF141	-0.335821	0.0105942
				RASL10B	-1.80077	0.0105942
				GFUS	0.643557	0.0106068
				ARPC1A	0.501457	0.0106068
				PSIP1	-0.807753	0.010616
				PEX19	-0.691457	0.010641
				SRCIN1	0.984207	0.0106642
				ATRIP	-0.85867	0.0106642
				ELK1	-0.850386	0.0106642
				CYFIP1	-0.478338	0.0106979
				RAB11FIP4	0.893178	0.010755
				COQ9	0.895087	0.0107772
				ANKZF1	-0.587944	0.0107772
				ATP5MK	0.875441	0.0107772
				RPL9	-0.478771	0.0109921
				RAB11B	0.63974	0.0110149
				GET1	0.77515	0.0110294
				ADSS2	-0.788109	0.0110519
				CLCN2	-0.672112	0.0110519
				GPI	1.03418	0.0110519
				CLTB	0.659453	0.0110707
				ARVCF	1.33112	0.0110707
				TAF10	-0.620596	0.0110866
				SBNO1	-0.711604	0.0110889
				TAF1C	-0.767116	0.0110889
				BID;cRAP-BID	-1.12397	0.0110997
				SLC26A11	0.665742	0.0111025
				MED22	-0.594995	0.0111391
				SDC4	-1.99762	0.0111391
				SCAMP1	0.855835	0.0111391
				PURG	0.654435	0.0111391
				GBE1	1.08979	0.0111391
				UTP25	-0.708284	0.0111391
				ATP1A2	1.58545	0.0111391
				VPS35	0.5112	0.0111391
				ZC3H14	-0.474956	0.011165
				RTTN	-0.7545	0.0111703
				PPP2R1B	-1.17082	0.0111796
				HID1	1.45023	0.0111796
				BLVRA	1.16534	0.0111921
				SNX11	0.725004	0.0112215
				CXXC5	-0.969866	0.0112413
				TSPAN31	-1.30044	0.0112722
				CLPP	0.522798	0.0113161
				HNRNPC	-0.467201	0.0113601
				SAV1	-0.895818	0.0113601
				RMC1	0.756373	0.0113601
				ECT2	-1.39507	0.0113601
				GDF11	0.90651	0.0113601
				DNAJC6	1.11854	0.0114118
				RPL23	-0.584316	0.0114118
				KCTD1	-0.761202	0.0114184
				SERPING1	-1.141	0.0114236
				ECHS1	0.811893	0.011458
				PAG1	1.91698	0.011482
				NT5C	0.732186	0.0115012
				MAPKBP1	1.03326	0.0115215
				CENPH	-1.61738	0.0115215
				ZMYM2	-0.748225	0.0115498
				KIFC1	-1.07031	0.0115634
				NDUFAF4	0.563143	0.0115699
				SPATA18	1.14952	0.011585
				GINS1	-1.60907	0.0115858
				PIK3CD	0.936681	0.0116308
				CDH13	0.971435	0.0116344
				MBTPS2	1.04767	0.0116344
				DPY30	-0.609349	0.0116349
				HARS2	0.62794	0.0116384
				INTS14	-0.479366	0.0116384
				WIPF1	-1.40505	0.0116384
				ZSWIM8	0.640408	0.0116521
				POLR3GL	-0.629686	0.0116838
				GNL1	0.475971	0.0116844
				RAD51C	-0.803417	0.0116844
				AUH	1.02991	0.0116994
				PEPD	0.751795	0.0117003
				UTP3	-0.575134	0.0117126
				DGKD	1.31828	0.0117332
				CC2D2A	1.41042	0.0117883
				WDR3	-0.590389	0.0117987
				TPM4	-0.741102	0.0118148
				PLCD1	-0.843418	0.0118348
				PIP4P1	1.02713	0.0119062
				SRBD1	-0.72412	0.01192
				FUBP3	-0.455522	0.01192
				SYNGAP1	0.626291	0.0119354
				PFDN5	-0.543277	0.0119373
				IGF2BP1	-0.601553	0.0119373
				MED8	-0.481852	0.0119373
				HAUS1	-0.847645	0.0119373
				RBIS	-0.871112	0.0119621
				SDR39U1	1.1257	0.0119648
				PRIM2	-1.41968	0.0119648
				NIPSNAP3A	0.857287	0.0120144
				ANKRD13D	1.12416	0.0120329
				IFT88	0.90545	0.0120329
				CIP2A	-1.15079	0.0120926
				AUP1	0.58831	0.0121103
				KBTBD8	0.693176	0.012119
				TMEM160	1.31267	0.0121837
				GREB1	-1.1076	0.0121862
				RANGAP1	-0.408668	0.0121862
				AURKB	-1.17748	0.0122638
				ERI1	-0.666872	0.0122928
				ATP5F1E;ATP5F1EP2	0.754242	0.0122928
				SPAG7	-0.753139	0.0123888
				GGACT	0.831921	0.0123888
				FOXK1	-0.77138	0.0124464
				ANAPC5	-0.57465	0.0124717
				TUBG2	1.1095	0.0125398
				SCO1	0.720611	0.012547
				COG7	0.505187	0.012547
				IDS	0.867422	0.0125505
				EXOSC1	-0.731288	0.0125722
				PRKRIP1	-1.11057	0.0125779
				CACUL1	-0.544609	0.012584
				PHF23	-0.678528	0.012626
				TOLLIP	0.6841	0.0126337
				SLC25A20	1.46616	0.0126399
				PIAS4	-0.661087	0.0127001
				DYRK2	0.979341	0.0127151
				SORBS1	-1.4638	0.0127153
				ABCC1	0.800875	0.0127305
				CTDSPL	-0.975876	0.0127407
				RPL3	-0.465677	0.0127901
				APLF	-0.827701	0.0128143
				RFXAP	-0.642246	0.0128228
				CD9	1.91741	0.0128228
				NPHP4	0.803234	0.0128228
				PRPF39	-0.5763	0.0128241
				UTP6	-0.502903	0.0128241
				PBXIP1	0.934707	0.0128241
				ZC3HAV1	-1.50186	0.0128241
				SUPT7L	-0.712035	0.0128404
				TRIM32	0.478519	0.0128682
				NUF2	-1.32166	0.0128953
				PA2G4	-0.471878	0.0129058
				B9D2	1.71948	0.0129058
				BCKDHB	0.526755	0.0129406
				ABCB6	1.14376	0.0129897
				FDX1	0.967655	0.0130321
				TOMM40	0.619382	0.0130417
				COG1	0.557323	0.0130464
				TIMM50	0.681052	0.0130768
				WDTC1	-0.596964	0.0131346
				DNMT1	-0.896326	0.013172
				GLB1L	1.19421	0.0131733
				SLC30A9	0.701586	0.0132217
				SELENOT	0.776799	0.0132268
				SLX9	-0.636348	0.0132268
				TPST1	-1.22252	0.0132268
				RPL12	-0.638565	0.0132828
				BBC3	-0.954741	0.0132843
				MCF2L	0.825163	0.0133381
				NME6	0.484731	0.0133934
				ORC3	-0.703273	0.01341
				CHAMP1	-0.618966	0.0134278
				RBM28	-0.490461	0.0134278
				JADE1	-1.38713	0.0134278
				EIF3C	-0.398605	0.0134278
				CAMSAP2	0.896362	0.0134278
				TIMM9	0.726145	0.0134904
				PDRG1	-0.655659	0.0135138
				MTA2	-0.610516	0.0135244
				NUDT18	0.806077	0.0135321
				RHBDD2	0.932788	0.0135949
				ZFYVE16	1.22898	0.0137104
				TTLL1	1.08917	0.0137327
				ATP9A	1.00302	0.0137327
				GET3	0.502292	0.0138342
				RMND5A	-0.469265	0.0138993
				SLC35F6	1.33829	0.0139422
				MPHOSPH6	-0.757669	0.0139618
				INPP5A	0.578089	0.0140185
				SMAD4	-0.662132	0.0140781
				CKAP2	-0.94759	0.0140794
				PSMC3IP	-1.21788	0.0141621
				CORO7	0.951443	0.0141915
				SMARCD2	-0.861785	0.0141915
				CUEDC1	0.901002	0.0141915
				POLDIP3	-0.563673	0.0142118
				CNNM4	0.672651	0.0142296
				CNPY4	0.818313	0.0142296
				GTF2F2	-0.52475	0.0142381
				RPL36	-0.47981	0.0142411
				STYX	-0.534131	0.0142537
				EPB41L3	1.06603	0.0142645
				SUDS3	-0.661519	0.0142823
				SNRNP70	-0.438779	0.0142904
				PINX1	-0.549434	0.014329
				UBE2L6	-0.818117	0.0143614
				DAXX	-0.682634	0.0143614
				SPAG1	1.19965	0.0143614
				AP2M1	0.444797	0.0144038
				EEFSEC	0.504184	0.0144066
				KIF3A	0.740482	0.0144066
				PDCD11	-0.649737	0.0144085
				NDUFAF5	0.796154	0.0144467
				AFG3L2	0.800468	0.0144467
				CDC25C	-1.36873	0.0145147
				SLC25A14	1.19089	0.0145572
				BCAT1	-0.947885	0.014561
				ZNF511	-0.833548	0.0146196
				MRPS6	0.561004	0.014623
				PRKACB	0.793655	0.0146306
				GAN	0.537872	0.0146612
				MARS2	0.744556	0.0146612
				HSD17B8	1.02417	0.014695
				RPL13	-0.52914	0.0147229
				ZC3H8	-0.65469	0.0147426
				RECQL5	-0.71816	0.0147426
				ZNF512B	0.920313	0.0147426
				RPL37A	-0.468465	0.0147426
				NOC2L	-0.584829	0.0147426
				ABCA3	1.39083	0.0147522
				KIF22	-1.36064	0.0148016
				NUCKS1	-0.385914	0.0148045
				ATP5MG	0.818976	0.0148201
				PIN4	-0.660248	0.014831
				DLST	0.610862	0.0149156
				MTFMT	0.57554	0.0149327
				RFTN1	0.792503	0.0149327
				DCTN5	0.49086	0.0149327
				SPRYD4	0.733819	0.0149901
				KDM4C	0.93174	0.0150042
				CUEDC2	-0.755605	0.0150186
				NTAQ1	-0.503749	0.0150528
				WBP11	-0.421905	0.0150659
				SF3B6	-0.426692	0.0150731
				RPL23A	-0.533384	0.0151444
				CSNK1G3	0.527664	0.015176
				RIPK2	-1.28428	0.0151794
				BAG1	0.762037	0.0152023
				CPE	1.30329	0.0152778
				GBP1	2.29343	0.0153572
				NRF1	-0.416279	0.0153572
				UCHL1	0.819562	0.0153572
				PUS10	-0.833057	0.0153572
				TRIM3	0.942319	0.0153572
				NCL	-0.444752	0.0153572
				RNF220	-0.755886	0.0154011
				HINT1	0.549823	0.0154011
				STX4	0.88249	0.0154011
				FDX2	1.12349	0.0154011
				CPNE3	0.486774	0.0154341
				EIF3K	-0.46798	0.0154341
				PACS1	0.611509	0.0154565
				ELMO1	-0.99857	0.0154565
				MBD3	-0.736265	0.0154895
				RPL26	-0.459828	0.0154895
				BAK1	1.03359	0.0154963
				DAPK3	-0.75647	0.0154963
				ULK4	0.678254	0.0154963
				POLD2	-1.07868	0.0154963
				PPP3CC	0.923586	0.0155027
				N4BP2	-0.666497	0.0155027
				KNTC1	-1.10576	0.0155027
				HMGN2	-1.37905	0.0155576
				XRCC6	-0.446371	0.015569
				PRORP	0.571332	0.0155886
				CCDC82	-0.681586	0.0155888
				ODF2	0.910985	0.0156223
				SFRP1	-1.19542	0.0156223
				HIC2	-0.725924	0.0157013
				FAM162A	0.900843	0.01571
				NUP42	-0.637054	0.01571
				GIPC1	0.513402	0.01575
				RIOX2	-0.533983	0.0157645
				CBX3	-0.483021	0.0158838
				ANAPC4	-0.493154	0.0159051
				CCDC120	1.02904	0.0159103
				LRPPRC	0.493956	0.0159276
				LIN37	-1.26837	0.0159276
				HDAC7	-0.839342	0.0159276
				FRAS1	0.949447	0.0159441
				RALBP1	-0.573204	0.0159456
				CAPN10	1.72738	0.0159554
				GMPPA	0.824998	0.0159945
				NIPBL	-0.573223	0.0160714
				TXN2	0.785657	0.0161269
				FAM83D	-2.2072	0.0161269
				CHID1	0.603215	0.0161269
				PRKCG	1.17148	0.01617
				MICOS10	0.833676	0.0161934
				SPRY1	1.34888	0.0162573
				OBI1	-0.808158	0.0162702
				ARHGEF40	-0.545492	0.0162702
				CPT1A	1.64498	0.0163798
				NTMT1	-0.535627	0.0163985
				TAF3	-0.835023	0.0164136
				DNAAF1	4.67991	0.0164136
				PCP4L1	1.55955	0.0164496
				PPCS	0.66646	0.0164496
				EAF1	-0.409336	0.0164667
				DCTN6	0.472222	0.0164858
				PYGL	0.750392	0.0164858
				DERPC	-0.467209	0.0164926
				ICA1L	1.09157	0.0165449
				COG5	0.586314	0.01655
				SLC35C2	1.02141	0.0166098
				OSBPL1A	0.637215	0.0166098
				ZNF280C	-1.00914	0.0166384
				PTCD1	0.616504	0.0166384
				METAP2	-0.726534	0.016642
				GART	-0.569076	0.0166538
				SF3A3	-0.468367	0.0167554
				SELENOM	1.16895	0.0167635
				PLA2G15	0.909507	0.0167781
				EIF4G3	0.468115	0.0167781
				IGF2BP3	-0.501013	0.0167781
				PAFAH1B3	0.745115	0.0167781
				LEPROT	1.27166	0.0168041
				ARHGAP39	0.637066	0.0168526
				POLA2	-1.2501	0.0168621
				TPR	-0.354715	0.0168621
				ZNRF2	-0.911337	0.0168621
				FOXJ1	0.857683	0.0168621
				SH2B1	1.48172	0.0168977
				CALCOCO1	-0.609237	0.0169009
				NDUFS2	0.599907	0.0169555
				DNMT3A	-0.638878	0.0169555
				GLCE	0.74764	0.016998
				SEPHS1	-0.660605	0.0170019
				FBXO28	-0.661249	0.0170665
				BNIP3	0.936268	0.017088
				SLC22A17	0.839855	0.017088
				PLEKHA7	1.32394	0.0171105
				ABAT	1.45767	0.0171346
				PAWR	-0.772801	0.0171346
				ALDH9A1	0.906307	0.0171356
				FAM241B	1.17707	0.0172539
				PPID	-0.46945	0.0173553
				IL17RD	1.5089	0.0174
				XPNPEP1	0.592011	0.0174378
				CCDC71	-0.820082	0.0174378
				SNRPC	-0.516202	0.0174378
				RPL4	-0.49402	0.0174709
				SF3A2	-0.436633	0.0175
				CHD4	-0.562596	0.0175046
				CFAP418	0.852548	0.0175046
				ATG13	-0.495022	0.0175046
				ATP6V1H	0.396209	0.0175116
				NHS	0.556212	0.0175262
				GTF3C2	-0.539433	0.0175348
				PHAF1	-0.73795	0.0176077
				RPL27	-0.507103	0.0176103
				TGM2	-2.50501	0.0176195
				TRMT5	-0.569819	0.0177448
				ARMC10	0.559996	0.0177725
				FERRY3	0.630905	0.0177725
				AVEN	-0.594829	0.0177725
				LYRM7	0.803544	0.0178452
				MUTYH	-0.43936	0.017895
				HEATR5B	0.461311	0.0179523
				RPL38	-0.515551	0.0179676
				NUP62	-0.381083	0.0179888
				CHAF1B	-1.70957	0.0179888
				SLC30A1	1.07829	0.0180188
				PPARD	3.39693	0.018044
				RELA	0.48767	0.018056
				MOCS2	-0.658802	0.018056
				MED15	-0.462508	0.0181713
				PFDN2	-0.469915	0.0181727
				EFNA5	-1.04367	0.0182241
				COQ6	0.742464	0.0182464
				PPIH	-0.50295	0.0182546
				FUCA2	1.2672	0.0182546
				RTCA	0.588437	0.0182763
				SLC3A2	1.05756	0.0182966
				LCORL	-0.572543	0.0182971
				MXRA7	1.22928	0.0183388
				AMACR	1.34911	0.0183388
				ABT1	-0.562533	0.0183442
				RPS2	-0.424251	0.0183765
				SOSTDC1	2.11963	0.0183823
				TF;cRAP-TF	2.668	0.0183823
				YBEY	0.699662	0.0183938
				ANP32A	-0.589861	0.0183938
				COA3	0.988963	0.0183983
				CHRNE	-1.20242	0.0184141
				RBM34	-0.46887	0.0184141
				NDNF	2.19646	0.0184141
				SDAD1	-0.574732	0.018423
				SEC24B	0.413466	0.0184245
				TPP2	-0.444038	0.0184478
				TMED8	0.58348	0.0184722
				PGM2L1	1.45732	0.0184722
				CMPK2	0.969907	0.0184817
				DYNC2H1	0.993651	0.0184875
				ALG12	1.01436	0.0185209
				VASP	-0.943792	0.0185746
				GNA12	0.603887	0.0185887
				EIF3G	-0.428105	0.0186745
				BBS9	0.797731	0.0186793
				CPSF6	-0.394441	0.0186793
				TCP11L1	-0.950736	0.0187203
				TRPM4	-0.800287	0.0187325
				ATM	-0.657383	0.0187454
				RNGTT	-0.660106	0.0187554
				DHX8	-0.503307	0.0187554
				ACTR10	0.471315	0.0187554
				BTBD1	-0.830859	0.0187567
				ETV6	-0.74193	0.0187567
				NPR3	-2.11575	0.0188005
				EXD2	0.666891	0.0188387
				FYTTD1	-0.771333	0.0188532
				PBK	-1.3752	0.0188559
				CHEK1	-1.21148	0.0188639
				USP11	-0.849573	0.0188639
				VRK2	-1.06576	0.0188663
				CLNS1A	-0.734813	0.0188972
				HAUS6	-0.774913	0.0189615
				RCOR3	-0.469805	0.0189679
				DNMBP	-0.642644	0.0189679
				HMGB3	-0.705207	0.0189679
				RPLP0	-0.459089	0.0189914
				GAS2	-1.34369	0.0191056
				RPP40	-0.456893	0.0191276
				CNN2	-0.834126	0.0191582
				EPB41L1	1.33246	0.019192
				PUM3	-0.621819	0.0192572
				LPCAT1	0.591433	0.0192646
				ALDOC	1.01071	0.0192646
				RPS5	-0.433341	0.0192742
				IGSF3	1.05447	0.0193022
				NFKBIE	0.419873	0.0193204
				RANBP2	-0.349245	0.0193356
				MTCH1	0.579189	0.0193528
				THYN1	-0.533581	0.0193528
				AHCYL2	0.70113	0.0193736
				MMUT	0.642176	0.0193736
				KIF20A	-1.09951	0.0193736
				RAB5B	0.54976	0.0193801
				NMD3	-0.485312	0.0193885
				ATF1	-0.481853	0.0193947
				BRCC3	0.39368	0.0194351
				DHRS3	0.789661	0.0194813
				ZNF526	-0.606205	0.0194969
				RALGAPB	0.567446	0.0195105
				UBXN1	-0.47623	0.0195358
				JARID2	-1.21026	0.0196261
				AGPAT3	0.949	0.0196261
				SPTBN1	0.795181	0.0196261
				SYF2	-0.8704	0.0196261
				SPC25	-1.54292	0.0197195
				SCML2	-0.908363	0.0197195
				PACSIN3	-1.5028	0.0198001
				LYRM1	1.59591	0.0198208
				GRPEL1	0.512401	0.019836
				SMPD2	0.978893	0.019836
				PHLDB2	-1.18924	0.0199205
				PDK2	1.01067	0.020023
				CYSTM1	1.23764	0.020023
				NUCB2	1.00353	0.020023
				KDM2B	-0.686354	0.0200985
				KTN1	0.623131	0.0202364
				RPL31	-0.523662	0.0202761
				RTN1	1.9903	0.0202778
				SORBS2	1.08224	0.0203204
				CLDND1	0.768597	0.0203204
				USP54	-0.52365	0.0203443
				WNK2	0.578773	0.0203443
				FBXO17	0.861675	0.0203794
				NUP133	-0.380265	0.0204134
				SNRPD1	-0.422206	0.0204551
				MPHOSPH8	-0.674102	0.0205873
				ODC1	-1.89052	0.0205992
				RPP30	-0.403881	0.0206
				TMEM205	0.902831	0.0206034
				RAB6B	1.51648	0.0206034
				TMEM135	1.15983	0.0206121
				RPL29	-0.527065	0.0206396
				HDAC2	-0.501375	0.0206803
				SUPT16H	-0.676649	0.0206803
				TMEM35A	1.85521	0.0207211
				DLAT	0.588202	0.0207211
				TEX30	-0.764532	0.0207798
				STEEP1	-0.558888	0.0207912
				B9D1	1.14999	0.0207912
				ACADVL	0.694511	0.0207912
				LRCH2	1.01947	0.0208145
				SUV39H1	-0.842634	0.0208306
				ALDH16A1	-0.482659	0.0208345
				SKIC3	0.374157	0.0208345
				THG1L	0.491771	0.0208432
				GULP1	0.734379	0.0208809
				EXOG	0.962703	0.0208823
				CLASRP	-0.590807	0.0208823
				FOXK2	-0.823618	0.0208823
				GMEB1	-0.592939	0.0208823
				TRIM65	-0.5672	0.0208976
				MARK2	0.487173	0.0208976
				CHCHD7	1.39565	0.0209039
				MTRES1	0.882168	0.0209354
				CCM2	0.582846	0.0209715
				VPS16	0.385382	0.0210158
				DUS1L	-0.828288	0.0210264
				BLTP1	0.652156	0.0210818
				PRKAB1	0.531498	0.0210969
				RPP14	-0.555083	0.0210969
				RBP1	1.51953	0.0211271
				TEX2	1.50619	0.0211894
				FAHD1	0.738687	0.0211993
				TCF3	-0.695003	0.0212526
				UNC119B	0.730712	0.0212673
				CCDC127	0.80994	0.0214025
				BCCIP	-0.572899	0.0214347
				SF1	-0.397223	0.0214933
				GK	1.35355	0.0215395
				TM7SF3	0.901692	0.0215658
				PPP3R1	0.515577	0.021589
				SRRM2	-0.412059	0.0215912
				ATP5PD	0.624144	0.0216045
				DNER	1.29102	0.0216045
				RRM1	-0.948333	0.0216045
				HMGN1	-0.630928	0.0216045
				PCYOX1L	0.64196	0.0216045
				RPS17	-0.397728	0.0216088
				ERO1B	0.930299	0.0216197
				FXR1	-0.425165	0.0216197
				TRAPPC10	0.422435	0.0216288
				BLM	-0.819906	0.0216288
				LTF;cRAP-LTF	1.42146	0.0216288
				ZNF207	-0.362539	0.0216288
				SMARCA4	-0.56073	0.0216288
				EIF3M	-0.453826	0.0216288
				PPP1R17	-2.61612	0.0216877
				USP4	-0.52222	0.0216877
				DENND10	0.419339	0.0217577
				NDUFV1	0.618285	0.0218762
				CLCC1	0.583886	0.0218839
				NDUFS3	0.627347	0.0219243
				MGAT4B	1.14477	0.0219243
				CPNE1	0.584323	0.0219334
				CFAP410	0.518435	0.0219583
				ATP5F1B	0.637495	0.0219705
				TUBB8	1.02932	0.0219989
				FBXO21	0.656555	0.0220343
				PHKG2	0.708461	0.0220507
				GPN3	-0.649142	0.0220507
				UBE2C;cRAP-UBE2C	-1.62335	0.0220507
				RPL24	-0.496071	0.0220507
				OSBPL7	0.503532	0.0220553
				SPOCK2	1.85614	0.0220867
				RPS6	-0.39011	0.0221486
				MAP1A	0.926564	0.0222433
				PBRM1	-0.636592	0.0222445
				GRAMD1A	0.758678	0.0222554
				ZNF483	-0.687737	0.0222554
				TLCD3A	0.982987	0.0223072
				MMAA	0.91661	0.0223072
				FSAF1	-0.454374	0.0223072
				COG2	0.535474	0.0223072
				CAMSAP3	0.613001	0.0223072
				CAMK1D	1.02449	0.0223156
				STAT5A	-0.683264	0.0223156
				RPL18	-0.492351	0.0223253
				POLR2F	-0.688504	0.0223253
				NUP107	-0.362218	0.0223278
				RACK1	-0.361867	0.0223357
				DDX60L	-1.20975	0.0223375
				POLDIP2	0.551767	0.0223375
				AAK1	0.480718	0.0224452
				PPP1R21	0.59387	0.0224721
				TBCEL	0.404769	0.0226717
				CEP135	0.533417	0.0226747
				SLC30A6	0.695571	0.0226892
				RAB35	0.663073	0.0226892
				SHPK	0.61521	0.0226892
				YDJC	0.535285	0.0226892
				SYNGR1	0.923606	0.0226959
				PIN1	0.566066	0.0228224
				SAMM50	0.609842	0.0228271
				ATIC	-0.598059	0.0228486
				CLCN3	0.739089	0.0228486
				RABEP2	0.468329	0.0228486
				SLC25A1	0.896977	0.0228652
				HOOK1	0.933002	0.0228652
				RETREG2	0.741585	0.0228659
				GFOD2	0.981227	0.022885
				SMAD5	-0.548748	0.0229085
				TAF6L	-0.598269	0.0229753
				TMEM168	0.603764	0.0229753
				CTPS1	-0.600273	0.0229753
				SPOUT1	-0.682017	0.0230589
				TFPI	-2.35626	0.0230688
				POU2F1	-1.0889	0.0231635
				ACTR5	-0.642032	0.0231641
				EZH2	-0.858349	0.0231641
				BRI3BP	1.21027	0.0231641
				HSCB	0.630035	0.0231807
				PPP6R2	0.436492	0.0232118
				GOT1	0.658046	0.0232195
				SMPD3	0.997016	0.0232195
				PRKACA	0.65436	0.0232523
				RBM47	1.43309	0.0234018
				RBM12	-0.455663	0.0234022
				VPS41	0.569066	0.0235087
				RPL15	-0.528085	0.023538
				FAM234A	0.673083	0.0235704
				ATAD3A	0.629395	0.0235704
				TANC1	0.82939	0.0235704
				DCUN1D2	1.18324	0.0235884
				CENPS	-1.00855	0.0235952
				REEP1	1.28955	0.0235952
				MAGOHB	-0.637744	0.0236433
				RFC1	-0.551077	0.0236433
				RREB1	-0.954549	0.0236572
				HNRNPD	-0.332214	0.0236894
				EHMT1	-0.672501	0.0236894
				TTC3	0.664686	0.0236946
				GRHPR	0.520115	0.0236946
				POLR2L	-0.4587	0.0236946
				PATZ1	-0.74768	0.0237022
				RPS3A	-0.395518	0.0237022
				FANCA	-1.38124	0.0237085
				KBTBD11	0.789577	0.0237127
				LRRC46	-0.726254	0.0237127
				SCAF8	-0.424727	0.0237193
				MBOAT2	0.824857	0.0237193
				KANK1	0.70971	0.0237193
				ZNF622	-0.616881	0.0237229
				PDCL3	-0.497041	0.0237353
				CDC42BPA	0.690408	0.0237582
				ORC5	-0.748136	0.0237582
				MSH3	-0.496533	0.0237762
				MED6	-0.481656	0.023802
				CTU1	0.406038	0.023802
				KYAT1	0.587081	0.023902
				NPEPPS	0.609582	0.023951
				COQ7	0.653558	0.023951
				EXOSC4	-0.607453	0.023951
				ICE2	-0.487879	0.0239784
				SVIL	-0.813627	0.0239784
				CLPB	0.631992	0.0239979
				MTUS2	0.625784	0.0239996
				BCAS4	0.994519	0.0240015
				BCORL1	-0.897184	0.0240015
				EIF3H	-0.38516	0.0240491
				UBR7	-0.813173	0.0240724
				FOXP1	-1.3372	0.024125
				IRF2BP2	-0.642903	0.024125
				FST	-1.75081	0.024125
				VTI1A	0.698938	0.024129
				SF3B1	-0.349358	0.024129
				HADHB	0.738311	0.024129
				FCSK	0.624578	0.0241612
				FAU	-0.510625	0.0241612
				GRSF1	0.510159	0.0241612
				YJU2	-0.511366	0.0241612
				TIA1	-0.604417	0.0242039
				TSPAN3	0.806505	0.0242314
				DCAF15	-0.590938	0.0242533
				ITPR1	1.11773	0.0242633
				OLFM3	1.53897	0.0242633
				ZC3H6	-0.747704	0.0242633
				TIMM22	0.889915	0.0243342
				SHFL	1.54926	0.0244535
				PPIF	0.903628	0.0244535
				EFCAB7	1.24121	0.0244635
				BUD13	-0.569392	0.0244635
				SIN3A	-0.527459	0.0244635
				PCDHA4	1.38786	0.0245552
				NR2F2	1.15426	0.0245552
				KIF4A	-1.1452	0.0246575
				POU5F1	-1.07917	0.0246575
				RPS16	-0.381815	0.0246776
				GNPTG	0.433561	0.0246776
				NDUFB5	0.748074	0.0246776
				CPSF1	-0.464241	0.0247237
				GNAZ	1.86446	0.0247329
				COX6B1	0.770191	0.02478
				WDR74	-0.656315	0.0247907
				GTF2B	-0.444289	0.0247907
				TMEM120A	0.778632	0.0247907
				RPL32	-0.525907	0.0247907
				COMT	0.663287	0.0247938
				PAPOLG	-0.682299	0.0247938
				IGF2R	-0.72471	0.0248009
				YIPF6	0.631817	0.0248807
				SCCPDH	0.623962	0.024929
				TYW5	0.813229	0.0249577
				TMEM33	0.584371	0.0249577
				PLCB3	-0.553478	0.0249577
				CASP2	-0.866596	0.0249779
				RAB13	-0.624633	0.024988
				SETDB1	-0.541537	0.0250176
				RRAGB	0.798701	0.0250921
				ADGRL3	1.0458	0.025095
				PPP4R2	-0.508455	0.025095
				SMCHD1	-0.540784	0.0251119
				QSER1	-0.613797	0.0251196
				SGCD	0.903573	0.0252005
				NUP93	-0.357031	0.0252405
				RBM17	-0.446738	0.025429
				GTPBP1	-0.41299	0.025429
				SSRP1	-0.652399	0.025429
				TMEM67	1.07531	0.025429
				FBXO33	-0.543178	0.025429
				RBM8A	-0.398024	0.0254908
				CTBS	1.79711	0.0255266
				DNALI1	1.32237	0.0255266
				GMPS	-0.469896	0.0255266
				FKBP7	-1.05536	0.0255604
				ZNF687	-0.551823	0.0255604
				ABCB10	1.05526	0.0255604
				TM9SF1	0.946078	0.0255772
				PRDX5	0.601682	0.0256316
				TTC38	0.864706	0.0256406
				CDS2	0.774966	0.0256675
				PSME3	-0.627892	0.0257063
				ERH	-0.452544	0.0257181
				AMZ2	-0.350137	0.0257181
				DDX10	-0.61794	0.0257181
				CCDC71L	-0.9946	0.0257675
				CEP44	-0.502687	0.0258586
				EPHX1	1.60059	0.0258742
				NAP1L1	-0.63726	0.0260158
				RHBDF1	-1.22554	0.026053
				CENPU	-1.15486	0.026068
				IMMT	0.555108	0.026068
				ANKRD16	0.410691	0.0261026
				FAM3A	0.690762	0.0261026
				SERBP1	-0.473686	0.0261053
				TUSC3	0.619804	0.026154
				SNCA	1.10111	0.0263283
				ATN1	-0.618868	0.0263294
				NUBP2	0.408692	0.0263294
				ROR2	0.786074	0.0263792
				MSMO1	1.35897	0.0263929
				ETFB	0.659472	0.0263929
				RNH1	0.448164	0.0264012
				TRIOBP	-0.512642	0.0264012
				PFKFB3	1.05123	0.0264035
				RNF2	-0.60536	0.0264258
				SNAP91	1.83338	0.0264303
				RPS15A	-0.450657	0.0264303
				PTMA	-0.702723	0.0264676
				C2CD2L	0.963516	0.0265325
				CDK2AP1	-0.804452	0.0267496
				POLRMT	0.553182	0.0268315
				CDK11A	-0.51841	0.0268753
				ADCK1	0.864369	0.0269174
				CDC20	-0.74075	0.0269275
				PRTG	-1.86306	0.0269326
				KATNB1	0.616528	0.0269472
				EBNA1BP2	-0.447142	0.0270271
				DYNC2I2	1.12909	0.0271957
				SMIM12	1.02339	0.027199
				ARPC2	0.407239	0.0273587
				SEC24C	0.496255	0.0273587
				TRH	-1.24403	0.0273723
				PLCB1	1.18196	0.0274261
				RAB31	-1.12501	0.0274336
				LSM3	-0.506128	0.0274808
				SNCB	1.45334	0.0274985
				INTS12	-0.530546	0.0274985
				UQCRQ	0.768553	0.0274985
				AP1M1	0.421569	0.0275705
				ACAD8	0.662895	0.0275705
				THRAP3	-0.444536	0.0275992
				KIDINS220	0.855714	0.0276102
				PRKAG2	0.77556	0.0277079
				PITPNM1	0.813399	0.0277146
				PAPSS1	-0.747781	0.0277298
				DNMT3B	-1.60538	0.0277298
				MT-ATP6	0.803482	0.0277298
				GNA13	0.634169	0.0277383
				LHFPL6	0.775541	0.0277906
				RPL27A	-0.443892	0.0277906
				ZBTB10	-0.46146	0.0278423
				RABL2A;RABL2B	0.837909	0.0278423
				SUZ12	-0.654416	0.0278586
				TMBIM6	-0.519848	0.0278966
				MTDH	0.777296	0.0278966
				RIC8A	0.312271	0.0278966
				RPL11	-0.474227	0.0279367
				PDP2	1.14892	0.0279367
				NSUN5	-0.690968	0.0279367
				ADGRL2	-0.654249	0.0279367
				DCHS1	0.686975	0.0279538
				SARNP	-0.414431	0.0279578
				TAB3	0.69605	0.0279578
				IGDCC3	-1.38663	0.0279765
				BECN1	0.431398	0.0279967
				PIGU	0.653695	0.0280308
				MBD2	0.901565	0.0280409
				ABL1	0.493148	0.028078
				ZNF106	-0.607097	0.028078
				BBX	-0.610019	0.0280887
				TIMM10	0.610892	0.0280887
				RPL17	-0.498772	0.0280887
				HADHA	0.778172	0.0280887
				PRMT2	0.958217	0.0280887
				MRGBP	-0.529338	0.0281368
[truncated: 658 more rows]

## Sheet: Supplementary Table 9
Supplementary Table 9. Functional enrichment analyses for differentially expressed proteins from APOE ε4 cortical organoids relative to non-carrier cortical organoids
PANTHER Biological Processes				KEGG Immune-Related Pathways				Reactome Immune-Related Pathways
Pathway	4 Weeks FDR	8 Weeks FDR		Pathway	4 Weeks FDR	8 Weeks FDR		Pathway	4 Weeks FDR	8 Weeks FDR
Viral process	1.29e-12	3.99e-36		Viral carcinogenesis	8.21e-12	1.72e-11		Adaptive Immune System	2.83e-05	8.1e-05
Protein phosphorylation	1.73e-09	3.78e-10		Hepatitis C	3.67e-09	3.52e-07		Immune System	9.65e-05	4.07e-06
Rhythmic process	1.79e-09	4.59e-11		Hepatitis B	1.4e-08	1.09e-12		TAK1 activates NFkB by phosphorylation and activation of IKKs complex	0.0007	2.46e-05
DNA repair	2.09e-09	5.79e-16		HTLV-I infection	1.56e-08	7.14e-12		TRIF-mediated TLR3/TLR4 signaling	0.000775	3.21e-08
Cell cycle	8.59e-09	7.82e-26		Measles	1.34e-07	5.79e-09		MyD88-independent cascade	0.000823	4.81e-08
Negative regulation of apoptotic process	6.83e-08	7.62e-09		Epstein-Barr virus infection	1.34e-07	3.72e-07		Toll Like Receptor 3 (TLR3) Cascade	0.000823	4.81e-08
Translation	1.1e-06	2.49e-14		Kaposi's sarcoma-associated herpesvirus infection	1.55e-07	3.99e-09		Toll-Like Receptors Cascades	0.00102	1.97e-05
Protein transport	5.02e-06	5.42e-06		RIG-I-like receptor signaling pathway	3.15e-06	0		TRAF6 Mediated Induction of proinflammatory cytokines	0.00107	3.34e-09
Chromatin remodeling	1.9e-05	2.26e-11		Legionellosis	8.96e-06	0		Signaling by TGF-beta Receptor Complex	0.00124	7.16e-06
Chromatin organization	3.52e-05	2.63e-13		Adipocytokine signaling pathway	1.09e-05	5.3e-08		Toll Like Receptor 9 (TLR9) Cascade	0.00145	9.6e-09
DNA recombination	3.62e-05	6.05e-06		NF-kappa B signaling pathway	5.44e-05	1.82e-05		Pausing and recovery of Tat-mediated HIV-1 elongation	0.0017	0.000192
MRNA splicing, via spliceosome	4.06e-05	7.82e-26		T cell receptor signaling pathway	5.8e-05	2.2e-07		Tat-mediated HIV-1 elongation arrest and recovery	0.0017	0.000192
Apoptotic process	4.17e-05	9.85e-07		B cell receptor signaling pathway	5.8e-05	1.13e-06		HIV Infection	0.00235	4.01e-09
DNA replication	0.000219	1.15e-19		Influenza A	0.000135	0.00106		Signaling by Interleukins	0.00236	4.49e-07
RNA metabolic process	0.00036	5.61e-07		TGF-beta signaling pathway	0.00015	0.000342		Activated TLR4 signalling	0.0024	1.82e-06
Regulation of cell cycle	0.000756	2.8e-08		IL-17 signaling pathway	0.000173	1.56e-05		Toll Like Receptor 4 (TLR4) Cascade	0.00327	4.58e-06
Protein localization	0.000877	0.00609		TNF signaling pathway	0.000192	3.72e-06		Transcription of the HIV genome	0.00344	0.000154
Chromatin assembly	0.00115	0.0178		Chagas disease (American trypanosomiasis)	0.000224	3.94e-07		MyD88:Mal cascade initiated on plasma membrane	0.00402	8.41e-07
Cellular process	0.00131	0.0162		Tuberculosis	0.000416	1.82e-05		Toll Like Receptor TLR1:TLR2 Cascade	0.00402	8.41e-07
Protein folding	0.00152	0.00166		Epithelial cell signaling in Helicobacter pylori infection	0.00138	2.94e-05		Toll Like Receptor TLR6:TLR2 Cascade	0.00402	8.41e-07
Mitochondrion organization	0.00152	3.32e-05		Pathogenic Escherichia coli infection	0.00202	1.82e-05		Toll Like Receptor 2 (TLR2) Cascade	0.00402	8.41e-07
RNA splicing	0.00167	6.21e-22		Shigellosis	0.00281	1.02e-07		Toll Like Receptor 10 (TLR10) Cascade	0.0043	1.14e-07
MRNA processing	0.00167	6.7e-23		NOD-like receptor signaling pathway	0.00407	0		Toll Like Receptor 5 (TLR5) Cascade	0.0043	1.14e-07
7_methylguanosine mRNA capping	0.00169	0		Toll-like receptor signaling pathway	0.0108	0.00416		MyD88 cascade initiated on plasma membrane	0.0043	1.14e-07
Cell proliferation	0.00196	7.52e-06		Antigen processing and presentation	0.011	0		TRAF6 mediated induction of NFkB and MAP kinases upon TLR7/8 or 9 activation	0.00528	2.56e-08
Intracellular protein transport	0.0081	0.0105		Th17 cell differentiation	0.0137	5.3e-07		TRAF6 mediated NF-kB activation	6.62e-06	0
Endocytosis	0.0108	0.000281		Toxoplasmosis	0.0221	0.00042		TNF signaling	8.03e-05	0
Protein targeting	0.0108	0.0237		Bacterial invasion of epithelial cells	0.0466	7.47e-05		RIG-I/MDA5 mediated induction of IFN-alpha/beta pathways	8.72e-05	0
Transcription by RNA polymerase II	0.0108	7.11e-05		Leishmaniasis	0.0466	0		p75NTR signals via NF-kB	0.000384	0
Regulation of gene expression, epigenetic	0.0164	0.0364		Th1 and Th2 cell differentiation	0	0.000342		NF-kB is activated and signals survival	0.0007	0
Transcription, DNA_templated	0.0189	4.85e-06		Salmonella infection	0	0.00039		Class I MHC mediated antigen processing & presentation	0.00076	0
Regulation of catalytic activity	0.0281	0.0237		Fc epsilon RI signaling pathway	0	0.000529		HIV-1 Transcription Initiation	0.000925	0
MRNA 3'_end processing	0	1.8e-08		Fc gamma R-mediated phagocytosis	0	0.00257		RIP-mediated NFkB activation via DAI	0.0014	0
Chromosome segregation	0	2.8e-08						Activation of NF-kappaB in B Cells	0.00189	0
Tricarboxylic acid cycle	0	2.26e-07						HIV-1 elongation arrest and recovery	0.00205	0
MRNA polyadenylation	0	2.77e-06						Pausing and recovery of HIV-1 elongation	0.00205	0
Oxidative phosphorylation	0	0.000182						NF-kB activation through FADD/RIP-1 pathway mediated by caspase-8 and -10	0.00213	0
Regulation of DNA_binding transcription factor activity	0	0.000486						Abortive elongation of HIV-1 transcript in the absence of Tat	0.00287	0
Fatty acid metabolic process	0	0.000669						DAI mediated induction of type I IFNs	0.00305	0
Fatty acid beta_oxidation	0	0.00198						Tat-mediated elongation of the HIV-1 transcript	0.00469	0
Fatty acid biosynthetic process	0	0.00266						Formation of HIV-1 elongation complex containing HIV-1 Tat	0.00469	0
Regulation of translation	0	0.0034						HIV-1 Transcription Elongation	0.00469	0
Regulation of binding	0	0.0102						Interleukin-1 signaling	0.00469	0
Nuclear transport	0	0.0102						Toll Like Receptor 7/8 (TLR7/8) Cascade	0	1.22e-08
Response to toxic substance	0	0.0121						MyD88 dependent cascade initiated on endosome	0	1.22e-08
Dorsal/ventral axis specification	0	0.0178						Cytokine Signaling in Immune system	0	8.41e-07
Metabolic process	0	0.0178						MAP kinase activation in TLR cascade	0	1.03e-06
Glycolytic process	0	0.0178						HIV Life Cycle	0	1.16e-06
Gluconeogenesis	0	0.0237						Late Phase of HIV Life Cycle	0	3.58e-06
Lipid metabolic process	0	0.0266						Host Interactions of HIV factors	0	1.67e-05
RNA splicing, via transesterification reactions	0	0.0324						Fcgamma receptor (FCGR) dependent phagocytosis	0	9.44e-05
Extracellular transport	0	0.0361						Influenza Infection	0	0.000101
								Downregulation of TGF-beta receptor signaling	0	0.000189

[truncated: 3 more sheets: Supplementary Table 10, Supplementary Table 11, Supplementary Table 12]
